1 Unraveling the roles of *Mast4* in amelogenesis via regulating DLX3  
2 and stem cell maintenance of mouse incisors

3

4 Dong-Joon Lee<sup>1,\*</sup>, Pyunggang Kim<sup>2,\*</sup>, Hyun-Yi Kim<sup>1,3</sup>, Jinah Park<sup>2</sup>, Seung-Jun Lee<sup>1</sup>, Haein  
5 An<sup>2</sup>, Jin Sun Heo<sup>2</sup>, Min-Jung Lee<sup>1</sup>, Hayato Ohshima<sup>4</sup>, Seiya Mizuno<sup>5</sup>, Satoru Takahashi<sup>5</sup>,  
6 Han-Sung Jung<sup>1,†</sup> and Seong-Jin Kim<sup>2,6,†</sup>

7

- 8 1. Division in Anatomy and Developmental Biology, Department of Oral Biology, Taste  
9 Research Center, Oral Science Research Center, BK21 FOUR Project, Yonsei  
10 University College of Dentistry, Seoul, 03722, Korea
- 11 2. GILO Institute, GILO Foundation, Seoul, 06668, Korea
- 12 3. NGeneS Inc., Ansan-si, Gyeonggi-do, 15495, Korea
- 13 4. Division of Anatomy and Cell Biology of the Hard Tissue, Department of Tissue  
14 Regeneration and Reconstruction, Niigata University Graduate School of Medical  
15 and Dental Sciences, Niigata, 951-8514, Japan.
- 16 5. Laboratory Animal Resource Center, University of Tsukuba, Tsukuba, Ibaraki, 305-  
17 8575, Japan
- 18 6. Medpacto Inc., Seoul, 06668, Korea

19

20 \* first authors equally contributed to this work

21 † correspondence

22 Han-Sung Jung [hsj8076@gmail.com](mailto:hsj8076@gmail.com)

23 Seong-Jin Kim [jasonsjkim@gilo.or.kr](mailto:jasonsjkim@gilo.or.kr)

24 Lead contact: Han-Sung Jung [hsj8076@gmail.com](mailto:hsj8076@gmail.com)

25 **Abstract**

26 Asymmetric division of stem cells allows for maintenance of the cell population and  
27 differentiation for harmonious progress. Developing mouse incisors allows for examination  
28 of how the stem cell niche employs specific insights into essential phases. Microtubule-  
29 associated serine/threonine kinase family member 4 (*Mast4*) knockout (KO) mice showed  
30 abnormal incisor development with weak hardness as the apical bud was reduced and  
31 preameloblasts were shifted to the apical side, resulting in Amelogenesis Imperfecta. In  
32 addition, *Mast4* KO incisors showed abnormal enamel maturation, and stem cell maintenance  
33 was inhibited as amelogenesis accelerated. Distal-Less Homeobox 3 (DLX3), known to be a  
34 critical factor Tricho-Dento-Osseous (TDO) syndrome, is considered to be responsible for  
35 Amelogenesis Imperfecta in humans. MAST4 directly binds to DLX3 and induces  
36 phosphorylation at three residues within the nuclear localization sites (NLS) that promote the  
37 nuclear translocation of DLX3. MAST4-mediated phosphorylation of DLX3 ultimately  
38 controls the transcription of DLX3 target genes, which are carbonic anhydrase and ion  
39 transporter genes involved in the pH regulation process during ameloblast maturation. Taken  
40 together, our data reveal a novel role of MAST4 as a critical regulator of ameloblast  
41 maturation, which controls DLX3 transcriptional activity.

42

43

44

45

46

47

48 **Keywords:**

49 MAST4, Mouse Incisor, DLX3, Wnt signaling, Stem Cell Maintenance

50

51

## 52 Introduction

53 During tooth development, ameloblasts derived from dental epithelial cells and  
54 odontoblasts from cranial neural crest mesenchymal cells are responsible for enamel and  
55 dentin formation, respectively. Rodent incisors can grow throughout their lifespan and  
56 therefore represent a fascinating model for studying the molecular and cellular events  
57 involved in stem cell maintenance and differentiation. The renewal of the dental epithelium  
58 that produces the enamel matrix and/or induction of dentin formation by mesenchymal cells  
59 is performed by stem cells that reside in the apical bud of the incisor (Harada, et al., 2002).  
60 The three major stages of amelogenesis are the secretory, transition, and maturation stages.  
61 Moreover, ameloblast cell-cell attachment, detachment, and cell movement are regulated so  
62 that the characteristic rodent decussating enamel rod pattern can form during the secretory  
63 stage of amelogenesis (Shin, et al., 2016; Bartlett and Smith, 2013).

64 *Wnt* signaling plays an important role in regulating cell proliferation, differentiation,  
65 and polarity (Rattanawarawipa, et al., 2016; Logan and Nusse, 2004). The canonical *Wnt*  
66 pathway mediates signaling by regulating the intracellular level and subcellular localization  
67 of  $\beta$ -catenin (Zhan, et al., 2018). An *in vitro* study of dental pulp cells revealed that *Wnt*  
68 signaling is downregulated by Distal-Less Homeobox 3 (DLX3) through regulation of DKK1  
69 expression (Zhan, et al., 2018). However, a recent study reported that *Wnt* signaling could  
70 also be upregulated by DLX3 through suppression of DKK4 (Sun, et al., 2019). In addition,  
71 in the hair follicle, *Dlx3* is located downstream of *Wnt* (Hwang, et al., 2008). As such, DLX3  
72 and *Wnt* signaling have a complex relationship.

73 *Dlx3* mutation is known to be responsible for not only Amelogenesis Imperfecta (AI)  
74 but also Tricho-dento-osseous (TDO) syndrome, which is an autosomal-dominant human  
75 disorder characterized by curly hair at birth, enamel hypoplasia, taurodontism, and thick  
76 cortical bone (Zhao, et al., 2016; Hyun and Kim, 2009; Lee, et al., 2008). AI is a genetic  
77 disorder characterized by morphological and functional defects in tooth enamel formation.  
78 Mutations in several genes are responsible for AI in humans, including *Amelogenin* (*Amelx*),  
79 *Ameloblastin* (*Ambn*), *Enamelin* (*Enam*), *Matrix metalloproteinase-20* (*Mmp20*), *Kallikrein-4*  
80 (*Klk4*), *Dlx3*, *WD Repeat domain-72* (*Wdr72*), *Family with Sequence Similarity 83 Member*  
81 *H* (*Fam83h*), and *Fam20a* (Muto, et al., 2012). Among these, DLX3 is a transcription factor  
82 that promotes enamel matrix proteins during amelogenesis (Zhang, et al., 2015). On the other

83 hand, a study using ameloblast-specific conditional knockout (KO) mice of *Dlx3* showed that  
84 DLX3 regulation of the target genes related to pH regulation for enamel maturation was more  
85 important than that of the genes of enamel matrix protein (Duverger, et al., 2017), suggesting  
86 that a complex mechanism exists in the role of DLX3 as a transcription factor during tooth  
87 development.

88 Preameloblasts differentiate into secretory ameloblasts that deposit an extracellular  
89 matrix consisting of proteins such as amelogenin, ameloblastin, enamelin, tuftelin, and  
90 MMP20 (Kang, et al., 2009; Hu and Simmer, 2007; Stephanopoulos, et al., 2005;  
91 MacDougall, et al., 1998), and mineralization is initiated. A shift from matrix deposition to  
92 resorption occurs at the transitional and maturation stages, as *Mmp20*, *Klk4* (Stephanopoulos,  
93 et al., 2005), *Amelotin* (Moffatt, et al., 2006; Iwasaki, et al., 2005) and *Odam* (Moffatt, et al.,  
94 2008) are predominantly expressed. Ablation of *Mmp20* in mice causes enamel to become  
95 thin, brittle, and flake off the underlying dentin (Shin, et al., 2016). KLK4 is a serine protease  
96 expressed during enamel maturation, and proteolytic processing of the enamel matrix by  
97 KLK4 is critical for normal enamel formation. Two proteases are secreted into the enamel  
98 matrix of developing teeth. The early protease was MMP20 and the late protease, KLK4.  
99 Mutations in *Mmp20* and *Klk4* both cause autosomal recessive AI (Kang, et al., 2009), a  
100 condition featuring soft, porous enamel containing residual protein (Lu, et al., 2008).

101 Protein kinases that alter the functions of their target proteins by phosphorylating  
102 specific serine, threonine, and tyrosine residues play a predominant role in the regulation of  
103 many intracellular signal transduction cascades that influence important cellular functions,  
104 such as DNA replication, cell growth, proliferation, differentiation, survival, and death  
105 (Roskoski, 2015). The microtubule-associated serine/threonine kinase family member 4  
106 (*Mast4*) is a human protein kinase identified in 2006 (Sun, et al., 2006). However, very little  
107 research has been undertaken on the developmental role of MAST4 and, to date, most studies  
108 have been limited to the brain and mental illness (Landoulsi, et al., 2018; Gongol, et al., 2017;  
109 Garland, et al., 2008). A previous study was found that the DNA binding activity of DLX3  
110 was regulated by phosphorylation of serine 138 by Protein Kinase C in keratinocytes and that  
111 DLX3 stability was regulated by phosphorylation of serine 10 by Protein Kinase A during  
112 osteoblast differentiation (Li, et al., 2014; Park, et al., 2001). However, studies on the  
113 phosphorylation of DLX3 in tooth development have not yet been conducted.

114 In this study, we demonstrated that the incisor teeth of *Mast4* KO mice showed



115 significantly different incisor phenotypes by physicochemical and histological methods.  
116 Through RNA sequencing analyses of the separated secretory ameloblasts and apical buds of  
117 *Mast4* KO mice, we confirmed an increase in amelogenesis-related genes and a decrease in  
118 *Wnt* signaling pathway-related genes. In addition, the regulation of nuclear localization of  
119 DLX3 by MAST4 seems to have influenced the physiological condition in the incisor enamel  
120 matrix. Here, we report a unique role of MAST4, which expresses the ameloblast layer in  
121 postnatal growing mouse incisors. These studies highlight the importance of MAST4 as a key  
122 regulator of mouse incisor amelogenesis and stem cell maintenance in the apical bud.

123 **Results**

124 **Incisor morphology, strength and enamel composition of *Mast4* KO mice show AI**  
125 **phenotype**

126 *Mast4* KO mice were generated using the CRISPR/Cas9 system with a targeted  
127 deletion of 71 base pairs on Exon1, which resulted in a premature stop codon by frameshift  
128 mutation (Figure 1A). *Mast4* KO mice were grossly similar to WT littermates after birth (data  
129 not shown). However, the maxillary and mandibular incisor teeth of *Mast4* KO mice began to  
130 bend and showed asymmetrical attrition at postnatal week 6 (Figure 1B, C). At 18 weeks,  
131 *Mast4* KO mice were all viable, but they possessed opaque mandibular incisors with chalky  
132 surfaces, while WT mandibular incisors were transparent and shiny (Figure 1D, E).

133 We also observed twisting to one side between the maxillary and mandibular incisors  
134 in 80 to 90% of *Mast4* KO mice, where the incisors were overgrown and the enamel of the  
135 maxillary incisors peeled off (Figure 1C arrow). Micro-computed tomography analysis of the  
136 head showed incisor malocclusion in *Mast4* KO mice more clearly (Figure 1F, G). To  
137 investigate the developmental patterns of molar dentition, histological analysis was  
138 performed at the bell stage (embryonic day 18.5; Figure 1 - Figure supplement 1A, B, D, E).  
139 The ameloblast layer arrangement of molar tooth germs in *Mast4* KO mice showed an  
140 irregular shape (Figure 1 - Figure supplement 1E arrowheads), compared to the molar tooth  
141 germs of WT mice. However, there was no difference in morphogenesis, including enamel  
142 knot formation. In addition, there were no differences in molar dentition between WT and  
143 *Mast4* KO mice until 10 weeks (Figure 1 - Figure supplement 1C, F).

144 Scanning electron microscopy (SEM) analysis was performed to compare the  
145 developing enamel of WT and *Mast4* KO mice (Figure 1H, I). This revealed that the enamel  
146 of developing *Mast4* KO mouse incisors contained a collapsed enamel rod arrangement.  
147 Furthermore, electron probe microanalyzer (EPMA) analysis was performed to investigate  
148 the mineral content of the incisors (Figure 1 - Figure supplement 2A, B). We divided the 6-  
149 week incisor calcified portion into two parts (secretory and maturation regions) and  
150 proceeded with EPMA analysis. Interestingly, in the maturation part of the *Mast4* KO incisor,  
151 calcium (Ca), magnesium (Mg), and phosphorous (P) was reduced, whereas there was no  
152 significant difference in the secretory part. We then performed a Vickers test to determine the  
153 hardness of WT and *Mast4* KO 6-week incisors. The Vickers test revealed that the loss of  
154 MAST4 expression significantly reduced the enamel hardness (Figure 1J). This difference in

155 intensity does not balance the force of the incisor bite and may lead to a twisted phenotype.  
156 These results indicated that *Mast4* KO could not facilitate the formation of long and parallel-  
157 oriented apatite crystals. Based on these results, the expression pattern of MAST4 (Figure  
158 1K-P) was confirmed in the Tomes process (Figure 1O, P arrowheads) and proximal and  
159 distal terminal web complexes (Figure 1L, M, O, P arrows) of the ameloblasts at 3 weeks and  
160 6 weeks in the incisor teeth. At 6 weeks, MAST4 expression was observed at the apical side  
161 (Figure 1P asterisks). These results suggest that the weakness of the incisor of *Mast4* KO  
162 mice compared to that of WT mice may be caused by dysregulation during amelogenesis.  
163

### 164 **Amelogenesis dysregulation in the incisor of *Mast4* KO mice**

165 Apical buds of mouse incisors contain an epithelial stem cell niche that provides the  
166 inner dental epithelium (IDE) cells that differentiate into ameloblasts. To investigate stem  
167 cell differentiation, the apical bud regions were dissected from the mandibles of 6-week WT  
168 and *Mast4* KO mice (Figure2 - Figure supplement 1A, B). Initiation of the enamel was  
169 shifted to the apical side of the *Mast4* KO incisor (Figure2 - Figure supplement 1B).  
170 Interestingly, the apical bud of the *Mast4* KO incisor appeared to be reduced (dotted line;  
171 Figure2 - Figure supplement 1B). In particular, the transit-amplifying (TA) zone seemed to  
172 have disappeared. We investigated the histology of the incisor teeth in sagittal, decalcified  
173 sections of WT and *Mast4* KO mice at 3 and 6 weeks (Figure 2A-D). No differences in  
174 incisor ameloblasts were detected at postnatal day 1 between WT and *Mast4* KO mice (data  
175 not shown). In WT mice, secretory stage ameloblasts were tall columnar, and enamel matrix  
176 proteins were present in the forming enamel (Figure 2A). During the maturation stage, WT  
177 mice exhibited characteristic shortened ameloblasts. In contrast, epithelial cells in the TA  
178 zone of the apical bud region appeared to have changed to secretory ameloblasts (Figure 2B).  
179 The initiation of enamel matrix secretion in the *Mast4* KO incisor was shifted to the apical  
180 bud region, while the initiation of secretion started after the TA region in the WT incisor  
181 (Figure 2A, B arrowheads). In the maturation stage, severe hypomineralization was detected  
182 in the *Mast4* KO incisor enamel (Figure 2B Maturation). The same features were shown in 6-  
183 week WT and *Mast4* KO mice (Figure 2C, D). The enamel layer was detached from the  
184 ameloblasts through the apical bud region to the maturation stage region in *Mast4* KO at both  
185 stages (Figure 2B, D asterisks). The maturation-stage enamel contained less enamel protein  
186 after decalcification in 6-week WT (Figure 2C, maturation arrow). On the other hand, the

187 *Mast4* KO maturation-stage enamel seemed to contain more enamel proteins (Figure 2D  
188 Maturation arrow). The enamel matrix proteins are substituted during enamel maturation, and  
189 the proportion of proteins in matured enamel is known to be less than 2% m/m(Avery, et al.,  
190 2002). This feature of excessive remaining enamel proteins was consistent with the low  
191 mineral composition and peeled enamel observed in *Mast4* KO mice (Figure 1C arrow;  
192 Figure1 - Figure supplement 2). Ectopic enamel secretion was verified with ameloblastin  
193 expression (Figure 2E, F), and ameloblastin was expressed and released to the enamel layer  
194 on the apical side in the *Mast4* KO incisor compared to the WT (Figure 2F arrowhead),  
195 suggesting that enamel matrix secretion is advanced in *Mast4* KO incisors. Schematic figures  
196 present these features of WT and *Mast4* KO incisors and the histological observations are  
197 summarized (Figure 2G).

198 To determine and identify additional molecules involved in disrupted amelogenesis  
199 in *Mast4* KO mice, we screened MMP20 and FAM83H by immunofluorescence in 6-week  
200 incisors derived from WT and *Mast4* KO mice (Figure 3A-H). Interestingly, the expression  
201 of MMP20, which aids enamel protein alignment in the enamel matrix and ameloblasts, did  
202 not change between WT and *Mast4* KO mice (Figure 3A, B). However, FAM83H secretion  
203 to the enamel matrix was significantly increased in the *Mast4* KO secretory region (Figure 3C,  
204 D). In the maturation region, the quantity of both proteins contained in the enamel matrix was  
205 reduced in *Mast4* KO compared to WT (Figure 3E-H). In particular, the expression of  
206 FAM83H, which plays a key role in enamel maturation, shifted to an early stage in the  
207 secretory region (Figure 3D, G arrows and arrowheads). These results are consistent with the  
208 shifted initiation of enamel secretion and reduced apical bud region in the *Mast4* KO incisor.

209 We further investigated RNA sequencing into two regions as apical buds and  
210 secretory ameloblasts between 6-week WT and *Mast4* KO incisors (Figure 3I). The major  
211 challenge can be considered that the *Mast4* KO apical bud region (properties of secretory  
212 ameloblasts and apical bud) and the secretory ameloblast region (properties of maturative  
213 ameloblast) due to reduction of apical bud in *Mast4* KO. Consequently, the transcriptome  
214 analysis of secretory ameloblasts (Figure 3I) represents exactly matching area as shown in  
215 Figure 3A-D. In the apical bud region, enamel matrix protein genes, including *Klk4*, *Enam*,  
216 and *Mmp20*, were increased in the *Mast4* KO mice. In the secretory ameloblast region,  
217 enamel matrix maturation-related genes, including *Fam83h*, *Dlx3*, and *Wdr72*, were increased  
218 in the *Mast4* KO mice. These results suggest that enamel secretion and maturation ended at

219 an early stage of amelogenesis in the *Mast4* KO incisor compared to the WT incisor.

220

## 221 **RNA sequencing analysis of *Mast4* deficiency and its effect on the *Wnt* signaling** 222 **pathway**

223 From RNA sequencing data with separated secretory ameloblasts and apical buds  
224 derived from 6-week WT and *Mast4* KO incisors, profile changes in the *Wnt* signaling  
225 pathway and stem cell maintenance were found. Genes selected through a differentially  
226 expressed gene (DEG) analysis were presented as heatmaps (Figure 4A, C), and a strong  
227 decrease in canonical *Wnt* signaling genes and stem cell maintenance-related genes were  
228 observed in both apical bud and secretory ameloblast regions. Gene ontology (GO) analysis  
229 was performed on the RNA sequencing results (Figure 4B, D). Canonical *Wnt* signaling was  
230 significantly reduced in both the apical bud and ameloblasts of *Mast4* KO mice. Interestingly,  
231 ossification was downregulated in *Mast4* KO ameloblasts. Some tooth mineralization  
232 markers were upregulated in apical buds. We confirmed these changes in the *Wnt* signaling  
233 pathway in *Mast4* nulled mHat9d cells, a dental epithelial stem cell line derived from the  
234 apical bud epithelium of a mouse incisor, where  $\beta$ -catenin was decreased in both the nucleus  
235 and cytoplasm (Figure 4E). *Mast4* ablation markedly decreased the transcription of *Wnt*  
236 signaling molecules, including *Wnt-3a*,  *$\beta$ -catenin*, and *Lrp5* (Figure 4F). This result suggests  
237 that ameloblast differentiation is accelerated due to altered *Wnt* signaling and stem cell  
238 maintenance in the apical bud region.

239

## 240 **MAST4 promoted nuclear translocation of DLX3 by inducing serine/threonine** 241 **phosphorylation of DLX3 within nuclear localization signal sites (NLS).**

242 Considering that the phenotypes of AI, including enamel disruption and a significant  
243 reduction in the mineral contents, shown in *Mast4* KO mice was similar to the phenotypes  
244 observed in conditional *Dlx3* KO mice (Duverger, et al., 2017), we focused on examining the  
245 relationship between MAST4 and DLX3 transcription factors, which play an essential role in  
246 amelogenesis. First, we checked the distribution pattern of DLX3 in WT and *Mast4* KO mice.  
247 The expression of DLX3 showed distinct localization patterns depending on the  
248 differentiation stages of the incisors in 6-week-old WT mice. DLX3 was predominantly  
249 located in the nuclei of ameloblasts at the secretory stage in the incisors of WT mice (Figure  
250 5A arrowheads). At the maturation stage, DLX3 expression still remained high in the nuclei

251 of ameloblasts, although cytosolic DLX3 expression was also increased (Figure 5B,  
252 arrowheads). However, in the incisors of *Mast4* KO mice, an even distribution of DLX3  
253 between the cytoplasm and nucleus was observed at the secretory stage (Figure 5C). In  
254 particular, DLX3 was predominantly localized in the cytoplasm at the maturation stage  
255 (Figure 5D arrows), suggesting that nuclear translocation of DLX3 might be impaired in  
256 *Mast4* KO mice.

257 Based on this observation, we examined whether MAST4 regulated the nuclear  
258 translocation of DLX3. Because of its high molecular weight (>285 kDa) and relatively low  
259 expression of full-length MAST4, we alternatively used a truncated *Mast4* construct  
260 (MAST4-PDZ) that contained a DUF, kinase, and PDZ domain. We first confirmed that  
261 DLX3 nuclear translocation was increased when MAST4 was stably overexpressed in  
262 mHat9d cells or transiently overexpressed HEK293T cells (Figure 5E and F, respectively). To  
263 further explore the relationship between MAST4 and DLX3, an immunoprecipitation assay  
264 was performed, and the interaction between MAST4 and DLX3 was observed (Figure 5G).  
265 Considering that MAST4 functions as a serine/threonine kinase and that DLX3  
266 phosphorylation affect the DNA binding activity of DLX3 (Park, et al., 2001), we examined  
267 whether MAST4 induced DLX3 phosphorylation. Interestingly, MAST4 significantly  
268 increased both serine and threonine phosphorylation of DLX3 in both mHat9d and HEK293T  
269 cells through immunoprecipitation assay (Figure 5H, I). Next, in order to obtain the basis for  
270 MAST4-induced phosphorylation sites, multiple deletion mutants of *Dlx3* were generated,  
271 and we found that MAST4 is bound to the C-terminus of the ND domain of DLX3, which  
272 was adjacent to the nuclear localization signal (NLS) region (124-150aa) (Figure 5J, K).

273 In a previous report, it was revealed that the NLS region of DLX3 is a critical  
274 location for nuclear translocation of DLX3 (Bryan and Morasso, 2000). In addition, the  
275 mechanism by which phosphorylation around the NLS region regulates protein translocation  
276 has been elucidated by adopting serine to alanine mutations of the target residues (Chung, et  
277 al., 2012; Greco, et al., 2011). Therefore, to investigate whether MAST4-induced  
278 phosphorylation adjacent to the NLS of DLX3 is necessary for its nuclear translocation, we  
279 generated a non-phosphorylatable mutant with alanine substitutions for the serine or  
280 threonine residues (T134, S137, and S138) within the NLS region (DLX3<sup>AAA</sup>). Interestingly,  
281 while MAST4 significantly increased serine and threonine phosphorylation of DLX3<sup>WT</sup>, the  
282 phosphorylation level of the DLX3<sup>AAA</sup> mutant was not regulated by MAST4 overexpression



283 (Figure 5L). Furthermore, DLX3<sup>AAA</sup> was localized in the cytoplasm more abundantly  
284 compared to DLX3<sup>WT</sup>, but its nuclear translocation was not promoted by MAST4 (Figure  
285 5M). These results suggest that the NLS phosphorylation of DLX3 by MAST4 is important  
286 for the nuclear translocation of DLX3.

287

### 288 **NLS phosphorylation of DLX3 by MAST4 regulated activation of DLX3 target genes** 289 **involved in pH regulation**

290 To understand the functional implications of NLS phosphorylation of DLX3  
291 transcription factor, a luciferase reporter assay using pGL3-3xDRE, which contained three  
292 copies of the DLX3-responsive elements, was performed to assess the transcriptional activity  
293 of both DLX3<sup>WT</sup> and DLX3<sup>AAA</sup> mutants (Duverger, et al., 2008). As expected, the basal  
294 transcriptional activity of DLX3<sup>WT</sup> was higher than that of the DLX3<sup>AAA</sup> mutant (Figure 6A).  
295 In particular, the transcriptional activity of DLX3<sup>WT</sup> was further enhanced when MAST4 was  
296 overexpressed, whereas the effect of MAST4 overexpression was relatively insignificant to  
297 the transcriptional activity of the DLX3<sup>AAA</sup> mutant. Next, we investigated whether DLX3  
298 occupancy at each target gene promoter was regulated by NLS phosphorylation by MAST4.  
299 In a previous report, direct target genes of DLX3, such as carbonic anhydrase and ion  
300 transporter genes involved in pH regulation have been identified, and DLX3 binding sites on  
301 the promoter of each target gene were identified (Duverger, et al., 2017). Referring to a  
302 previous report, ChIP assays were conducted to examine DLX3 binding to the target gene  
303 promoter in HEK293T cells. Interestingly, in the case of carbonic anhydrase genes, such as  
304 *CA6* and *CA12*, and ion transporter genes, such as *CFTR*, *SLC24A1*, and *SLC26A1*, DLX3<sup>WT</sup>  
305 showed higher occupancy than DLX3<sup>AAA</sup> (Figure 6B-F). In particular, the occupancy of  
306 DLX3<sup>WT</sup> on the target gene promoter was further enhanced by MAST4-PDZ overexpression,  
307 while that of DLX3<sup>AAA</sup> was not affected. Next, to confirm whether the mRNA levels of target  
308 genes were regulated by altered translocation of DLX3, RT-PCR was performed in mHat9d  
309 cells. The mRNA expression of carbonic anhydrases *Car6* and *Car12*, and the ion  
310 transporters *Slc26a1* and *Slc34a2* were significantly increased by transfection with DLX3<sup>WT</sup>  
311 and further enhanced when MAST4-PDZ was transiently overexpressed (Figure 6G).  
312 However, the mRNA expression of the target genes was not increased by the DLX3<sup>AAA</sup>  
313 mutant, and MAST4-PDZ-mediated increase was not observed when the DLX3<sup>AAA</sup> mutant  
314 was transiently overexpressed. These results indicate that NLS phosphorylation of DLX3 by



315 MAST4 plays an important role in promoting the nuclear translocation of DLX3 and  
316 subsequent activation of the target genes.

## 317 Discussion

318 *Mast4* KO mice showed abnormal enamel formation in incisor dentition. Specifically,  
319 enamel opacity was increased in the mandibular incisors of *Mast4* KO mice, while there was  
320 reduced enamel hardness in *Mast4* KO mice compared to WT mice. During dentinogenesis,  
321 odontoblasts secrete an unmineralized, collagen-rich extracellular matrix termed predentin.  
322 Later, the predentin is transformed into mineralized tissue when apatite crystals are deposited  
323 within and around collagen fibrils (Ye, et al., 2004). After dentin matures, enamel can be  
324 deposited on the dentin surface by ameloblasts (Nanci, 2017). MAST4 seems to regulate  
325 these mechanisms. During amelogenesis, a fibrous protein meshwork and vesicle-like  
326 structures were formed instead of the normal enamel matrix in the *Mast4* KO incisor. In  
327 several gene transformation studies that produce AI or enamel hypoplasia, abnormal  
328 amelogenesis, and disorganization of ameloblasts have been reported (Yan, et al., 2017;  
329 Seidel, et al., 2010). The vesicle-like structure formation in the enamel matrix has also been  
330 reported in a similar AI induction study (Barron, et al., 2010).

331 Based on SEM analysis and EPMA testing, the grid shape of the enamel rod array  
332 collapsed, and insufficient mineral content was observed. The hardness study also showed  
333 that the overall enamel quality was inferior, and this problem is thought to be caused by a  
334 failure in the maintenance mechanism of the stem cell niche, which is known to exist in the  
335 apical bud. This finding is supported by the fact that this abnormality was not found at the  
336 embryo or newborn stage, and no disruption was found in relation to the molar dentition,  
337 which does not require stem cell maintenance. Failure of appropriate stem cell maintenance  
338 may shift or advance the differentiation of inner dental epithelium cells to a secretory  
339 ameloblast stage in the apical bud region. The enamel matrix secretion was also accelerated  
340 in sequence, and the discrepancy with maturation timing was thought to cause  
341 physicochemical problems.

342 The present study suggests that DLX3 is a key factor associated with stem cell  
343 maintenance and maturation regulation. Several previous studies have shown that DLX3  
344 regulates enamel matrix protein secretion by functioning as a matrix protein transcription  
345 factor (Duverger, et al., 2017; Zhang, et al., 2015) and by regulating DKK1, which is known  
346 as a *Wnt* signaling inactivator (Yang, et al., 2018; Zhan, et al., 2018). In addition, it has been  
347 reported that DLX3 is a downstream target of the *Wnt* signaling pathway in hair follicle  
348 development (Hwang, et al., 2008). Interestingly, RNA sequencing data revealed that *Mast4*

349 regulated not only *Dlx3*-related genes, but also canonical *Wnt* signaling-related genes.  
350 Numerous studies have shown that *Wnt*/ $\beta$ -catenin signaling is closely related to stem cell self-  
351 renewal and maintenance in several organs (Kretzschmar and Clevers, 2017; Xu, et al., 2016;  
352 Ring, et al., 2014; Nusse, 2008). Moreover, our previous study revealed a failure of  
353 spermatogonial stem cell maintenance in the *Mast4* KO testis, although the signaling pathway  
354 involved is different from DLX3 (Lee, et al., 2020). In addition, considering that no  
355 abnormalities were found in the molars where adult stem cells do not exist after their  
356 development being completed at the fetal stage, it can be inferred that MAST4 is involved in  
357 the maintenance of adult stem cells in several signaling pathways.

358 At the amelogenesis stage, it is well known that DLX3 also regulates transcription of  
359 enamel matrix genes. However, it was reported that the transcription of DLX3 target genes  
360 related to enamel matrix was not significant in the study using *Dlx3* conditional KO mice,  
361 although they still showed the AI phenotype (Duverger, et al., 2017). In our study, the mRNA  
362 expression levels of enamel matrix proteins did not change significantly, suggesting that  
363 another *Dlx3* targets such as genes involved in pH regulation during ameloblast maturation  
364 are critical for AI phenotype. Our results demonstrate that MAST4 interacts with DLX3 and  
365 regulates DLX3 transcriptional activity, which may ultimately affect incisor amelogenesis. In  
366 addition, the nuclear location of various proteins that have NLS is regulated by the  
367 phosphorylation of NLS (Nardozzi, et al., 2010). We confirmed that MAST4 is directly  
368 bound to DLX3 and phosphorylated three residues located in the NLS, ultimately enhancing  
369 both nuclear translocation and target gene activation. The result that the genes involved in pH  
370 regulation are specifically regulated by MAST4 and DLX3 is highly correlated with the  
371 abnormal ion distribution shown in the previous EPMA results in *Mast4* KO mice (Figure 1 -  
372 Figure supplement 2). Overall, the mislocalization of DLX3 due to the loss of MAST4 failed  
373 the ameloblast maturation process, which requires appropriate pH regulation, ultimately  
374 resulting in the AI phenotype. These previous studies and our results suggest that MAST4 is a  
375 putative candidate involved in controlling the activity of DLX3.

376 Considering that DLX3 is a transcription factor, the distribution of DLX3 appears to  
377 affect enamel matrix protein secretion by moving to the nucleus during the secretory stage.  
378 The fact that MAST4 is involved in the nuclear localization of DLX3 also supports this  
379 hypothesis. A summary of the relationship between MAST4 and DLX3 is shown in Figure 7.  
380 Despite the nuclear localization of DLX3 in mHat9d cells, the cause of decreased FAM83H

381 and ameloblastin was not uncovered in this study. Since mHat9d, a cell line originating from  
382 the apical bud was used, it suggests the possibility of DLX3 acting differently, depending on  
383 the degree of differentiation. Specifically, transcriptome analysis of the previous study  
384 reported that the genes involved in pH regulation (*Cftr*, *Slc24a4*, *Slc26a7*, *Slc34a2*, and  
385 *Slc39a2*) increased significantly from the secretory stage to the maturation stage, and the  
386 expression of *Mast4* also increased by 3.2-fold (Simmer, et al., 2014), raising the need for a  
387 more detailed study of *Mast4* during ameloblast maturation.

388 In conclusion, MAST4 plays a key role in the maintenance of stem cells and the  
389 regulation of differentiation. The ablation of *Mast4* causes accelerated amelogenesis in the  
390 incisor tooth, improper enamel maturation, and abnormal physical properties. These  
391 phenomena are triggered by the regulation of DLX3 localization by MAST4. These findings  
392 suggest a novel mechanism for controlling the transcriptional activity of DLX3. MAST4 is  
393 closely associated with the entire amelogenesis process in mouse incisors and could therefore  
394 represent a crucial modulator of AI.

## 395 **Materials and Methods**

### 396 **Animals**

397 All animal experiments were approved by Yonsei University Health System  
398 Institutional Animal Care and Use Committee (YUHS-IACUC) in accordance with the Guide  
399 for the care and use of laboratory animal (National Research Council, USA). The animal  
400 study plan for these experiments (2017-0206) was reviewed and approved by this committee.  
401 All the mice were housed in a temperature-controlled room (22°C) under artificial  
402 illumination (lights on from 05:00 to 17:00) and 55% relative humidity, and they had ad  
403 libitum access to food and water. Adults from each developmental stage (3 weeks, 6 weeks,  
404 10 weeks, and 18 weeks) were used in this study.

405 To generate *Mast4* KO mice by CRISPR/Cas9-mediated gene targeting, we targeted  
406 exon 1 of *Mast4* (RefSeq Accession number: 175171); 5'- GGAAACTCTGTCCGAG  
407 GAAG-3' (exon 1). We then inserted each sequence into the pX330 plasmid, which carried  
408 both guide RNA and Cas9 expression units, from Dr. Feng Zhang (Addgene plasmid 42230)  
409 (Cong, et al., 2013). We named these vectors as pX330-Mast4-E1 and pX330-Mast4-E15.  
410 The schematic figure of the targeted exon1 and translated peptide is illustrated in Figure 1A.

411 Pregnant mare serum gonadotropin (five units) and human chorionic gonadotropin  
412 (five units) were intraperitoneally injected into female C57BL/6J mice (Charles River  
413 Laboratories, Kanagawa, Japan) at a 48-h interval, which were then mated with male  
414 C57BL/6J mice. The pX330-Mast4-E1 and pX330-Mast4-E15 (circular, 5 ng/μl each) were  
415 co-microinjected into 231 zygotes collected from oviducts of mated female mice. The  
416 surviving 225 injected zygotes were transferred into the oviducts of pseudopregnant ICR  
417 females, and 47 newborns were obtained. Genomic DNA was collected from the tails of 31  
418 surviving founder mice.

419 To confirm the indel mutation induced by CRISPR/Cas9, we amplified the genomic  
420 region, including the target sites, by PCR with the primers for exon 1 target (Supplementary  
421 Table 1). The PCR products were sequenced using the BigDye Terminator v3.1 Cycle  
422 Sequencing Kit (Thermo Fisher Scientific) and the *Mast4*-1 genotype F primer. In male  
423 founder #38, we found indel mutations in both exon 1 and exon 15 without pX330 random  
424 integration. To identify the indel sequence and whether indel mutations in exon 1 occurred on  
425 the same chromosome (cis manner), founder #38 was mated with a wild-type female, and the

426 indel mutations in F1 were sequenced. We obtained 17 F1 newborns, of which 12 carried a 71  
427 bp deletion (chr13:103,333,981-103,334,051: GRCm38/mm10) in exon 1 in a cis manner.

428

#### 429 **Vickers hardness test**

430 Erupted portions of incisors from 6-week-old WT and *Mast4* KO littermate mice  
431 were washed and dehydrated with graded alcohol. Incisors were sagittally embedded in a  
432 hard-formulation epoxy embedding medium (EpoFix, EMS, Hatfield, PA, USA). Samples  
433 were ground and polished with an EcoMet 30 grinder polisher (Buehler, IL, USA), 1500 grit  
434 sandpaper, 400 rpm, and 0.25  $\mu\text{m}$ . The enamel microhardness of the polished samples was  
435 measured using an MMT-X testing machine (Matsuzawa, Akita, Japan). Testing was  
436 performed with a load of 25 g for 5 s using a Vickers tip. Five indentations per sample were  
437 performed on eight incisors (four maxillary and four mandibular) per group and measured.

438

#### 439 **Cell culture**

440 The mHat9d cell line was obtained from Professor Harada's laboratory (Iwate  
441 Medical University, Japan). mHat9d is a dental epithelial stem cell line derived from the  
442 apical bud epithelium of a mouse incisor. Cells were cultured in 1:1 mixture of Dulbecco's  
443 modified Eagle's medium and Ham's F-12 (DMEM/F-12; #11320-033, Life Technologies,  
444 USA) containing B-27 supplement (#17504-044, Life Technologies, USA), Fibroblast  
445 Growth Factor-basic (bFGF; 25 ng/mL, #100-18B, PeproTech, Inc., USA), Epidermal  
446 Growth Factor (EGF; 100 ng/mL, AF-100-15, PeproTech, Inc., USA) at 37°C in a humidified  
447 atmosphere with 5% carbon dioxide (CO<sub>2</sub>). The HEK293T cells were grown in DMEM  
448 (WELGENE, Korea) containing 10% fetal bovine serum (WELGENE) and 1% penicillin-  
449 streptomycin (WELGENE).

450 To establish *Mast4*-depleted mHat9d cells, lentiCRISPRv2 vector (#52961, Addgene,  
451 USA) was digested with BsmBI and ligated with annealed oligonucleotide targeting *Mast4*  
452 exon 1, 5'-TACCCTGCCGCTGCCGCACC-3' (LentiCRISPRv2-Mast4 Ex1). The vector  
453 without insertion was used as a control. To generate the lentivirus, HEK293T cells were  
454 transfected with LentiCRISPRv2-Mast4 Ex1 and packaging vectors (pVSVG and psPAX2)  
455 using FuGENE® (E2311, Promega, WI, USA) at 70% confluency. The viral supernatant was  
456 harvested at 48 h post-transfection, filtered through 0.45- $\mu\text{m}$  filters and applied to mHat9d  
457 cells. The clonal cells were selected with puromycin (A11138-03, Life Technologies, USA) at

458 48 h post-transfection. To establish retrovirus based-Mast4-overexpressing mHat9d cells,  
459 both control LPCX and MAST4-PDZ-LPCX vectors with pVSVG were transfected in GP2-  
460 293 cells. The supernatant containing recombinant retroviruses was collected 36 hours after  
461 transfection and filtered through 0.45- $\mu$ m sterilization. Virus application and puromycin  
462 selection were performed using the same protocol as for lentivirus.

463

#### 464 **RNA sequencing**

465 Libraries were prepared for 150 bp paired-end sequences using a TruSeq Stranded  
466 mRNA Sample Preparation Kit (Illumina, CA, USA). Namely, mRNA molecules were  
467 purified and fragmented from 1  $\mu$ g of total RNA using oligo dT magnetic beads. The  
468 fragmented mRNAs were synthesized as single-stranded cDNAs through random hexamer  
469 priming. By applying this as a template for second strand synthesis, double-stranded cDNA  
470 was prepared. After the sequential process of end repair, A-tailing and adapter ligation, cDNA  
471 libraries were amplified with PCR (Polymerase Chain Reaction). The quality of these cDNA  
472 libraries was evaluated with the Agilent 2100 BioAnalyzer (Agilent, CA, USA), and they  
473 were quantified with the KAPA library quantification kit (Kapa Biosystems, MA, USA)  
474 according to the manufacturer's library quantification protocol. Following cluster  
475 amplification of denatured templates, sequencing was progressed as paired-end (2 $\times$ 150bp)  
476 using Illumina NovaSeq 6000 sequencer (Illumina, CA, USA). Low quality reads were  
477 filtered according to the following criteria: reads contain more than 10% skipped bases, reads  
478 contain more than 40% of bases whose quality scores are less than 20 and reads with an  
479 average quality score of less than 20. The whole filtering process was performed using the in-  
480 house scripts. Filtered reads were mapped to the reference genome related to the species  
481 using the aligner TopHat (Trapnell, et al., 2009). The gene expression level was measured  
482 with Cufflinks v2.1.1 (Trapnell, et al., 2010) using the gene annotation database of the  
483 species. To improve the accuracy of the measurement, multi-read-correction and frag-bias-  
484 correct options were applied. All other options were set to default values.

485

#### 486 **Subcellular fractionation and Western blot**

487 Virus-infected cells were lysed in RIPA buffer containing a protease inhibitor  
488 cocktail (cOmplete; #11697498001, Roche, IN, USA). Nuclear and cytoplasmic fractions of  
489 mHat9d cells were performed using the NE-PER Nuclear and Cytoplasmic Extraction



490 reagents (Thermo Scientific), according to the manufacturer's protocols. Cell extracts were  
491 fractionated by SDS-PAGE transferred to a polyvinylidene difluoride membrane using a  
492 transfer apparatus according to the manufacturer's protocols (Bio-Rad). After incubation with  
493 3% BSA in TBST (10 mM Tris, pH 7.4, 150 mM NaCl, 0.1% Tween 20) for 60 min, the  
494 membrane was incubated with antibodies against anti- $\beta$ -catenin (SC-7199, Santa Cruz  
495 Biotechnology, Inc., USA; dilution 1:2000), anti-Histone H3 (ab4729, Abcam, UK; dilution  
496 1:200) and anti-GAPDH (SC-32233, Santa Cruz Biotechnology, Inc., USA; dilution 1:100),  
497 anti-Flag (F3165; Sigma-Aldrich, USA; 1:5000), anti-HA (sc-7392, Santa Cruz  
498 Biotechnology, USA; 1:1000), anti-Lamin B (SC-374015, Santa Cruz Biotechnology, Inc.,  
499 USA; 1:1000) and anti- $\alpha$ -tubulin (T5168, Sigma-Aldrich; 1:3000) at 4 °C overnight.  
500 Membranes were washed six times for 10 min and incubated with HRP-conjugated secondary  
501 antibodies for 2h. Blots were washed six times with TBST and developed with the ECL  
502 system (RPN2232, GE Healthcare Life Sciences, USA) according to the manufacturer's  
503 protocols.

504

### 505 **Immunohistochemistry**

506 Samples were fixed in 4% paraformaldehyde in phosphate buffered saline (PBS),  
507 decalcified in 10% EDTA (pH 7.4; BE021, Bio-solution co. Ltd., Korea) for 48 h at 50°C and  
508 then embedded in paraffin using standard procedures. Sections (6- $\mu$ m thickness) of the  
509 specimens were incubated in 10 mM citrate buffer (pH 6.0) overnight at 60°C or Proteinase K  
510 (10  $\mu$ g/ml, AM2546, Thermo Fisher Scientific, United States) for 20 min at 37 °C. The  
511 specimens were incubated with anti-MAST4 (BS5791, Bioworld Technology, Inc., USA;  
512 dilution 1:150), anti-DLX3 (PA5-40506, Invitrogen, OR, USA; dilution 1:100), anti-MMP20  
513 (ab198815, Abcam, UK; dilution 1:100), anti-FAM83H (NBP1-93737, Novus Biologicals,  
514 USA; dilution 1:50) antibodies at 4°C overnight. The specimens were incubated with goat  
515 anti-rabbit Alexa Fluor 488 (A11008, Invitrogen, OR, USA; dilution 1:200) or goat anti-  
516 mouse Alexa Fluor 488 (A11001, Invitrogen, OR, USA; dilution 1:200). The sections were  
517 counterstained with TO-PRO<sup>TM</sup>-3 (T3605, Invitrogen, OR, USA; dilution 1:1000) and  
518 examined using a confocal laser microscope (DMi8, Leica, Germany).

519

### 520 **Immunoprecipitation (IP)**

521 Cells were lysed with RIPA buffer containing protease inhibitor cocktail (Complete;  
522 Roche). For immunoprecipitation, protein extracts were incubated overnight with the  
523 indicated primary antibodies at 4°C. Dynabeads Protein G (Invitrogen) was used to  
524 precipitates antibody-bound proteins. Samples were separated by SDS-PAGE and electro-  
525 transferred to a polyvinylidene difluoride membranes (PVDF; Millipore). The membrane was  
526 blocked at room temperature for 1h and incubated with the indicated primary antibodies  
527 overnight at 4°C. The primary antibodies used were as follows: phospho-Serine (P5747,  
528 Sigma-Aldrich; 1:1000), phospho-Threonine (#9386, Cell signaling; 1:1000), DLX3 (PA5-  
529 40506, Invitrogen, OR, USA), HA(F-7, Santa Cruz Biotechnology), Flag (F3165; Sigma-  
530 Aldrich, USA; 1:5000) and  $\alpha$ -tubulin (T5168, Sigma-Aldrich; 1:3000). Horseradish  
531 peroxidase-conjugated antibodies (Millipore) were used as secondary antibodies. The  
532 peroxidase reaction products were visualized with WESTZOL (Intron). All signals were  
533 detected by Amersham Imager 600 (GE Healthcare Life Sciences).

534

#### 535 **Site-directed mutagenesis**

536 Using the Flag-tagged wild-type *Dlx3* plasmid (Flag-DLX3 or DLX3<sup>WT</sup>) as a  
537 template, PCR-based mutagenesis was performed using a primer containing the desired  
538 mutation site (T134, S136, and S137). We generated mutations that mimicked either inactive  
539 phosphorylation status (serine/threonine to alanine) or activated phosphorylation status  
540 (serine/threonine to aspartic acid). The completed PCR product was cut with DpnI for 2 h and  
541 transformed into E.coli DH5alpha competent cells by heat shock. Colonies from each plate  
542 were grown and DNA was extracted. Mutations were verified by sequencing.

543

#### 544 **Real-Time quantitative PCR (RT-qPCR)**

545 For the RT-qPCR, the total RNA of the cells was extracted using TRIzol reagent  
546 (Invitrogen, Carlsbad, CA). The extracts were reverse transcribed using Maxime RT PreMix  
547 (#25081, iNtRON, Korea). RT-qPCR was performed using a StepOnePlus Real-Time PCR  
548 System (Applied BioSystems, USA). The amplification program consisted of 40 cycles of  
549 denaturation at 95°C for 15 s and annealing at 60 °C for 30 s. The expression levels of each  
550 gene are expressed as normalized ratios against the *B2m* housekeeping gene. RT-qPCR

551 experiments were processed at least three independent trials with consistent results. The  
552 oligonucleotide primers for RT-qPCR are described in Supplementary Table 1.

553

#### 554 **ChIP assay**

555 Cells were cross-linked with 4% paraformaldehyde for 10 minutes at room  
556 temperature. Glycine was added to a final concentration of 125 mM for 5 minutes to quench  
557 the formaldehyde crosslinks. Cells were washed with ice-cold phosphate buffered saline,  
558 harvested by scraping, pelleted, and resuspended in SDS lysis buffer (50 mM Tris-HCl [pH  
559 8.1], 1% SDS, 10 mM EDTA) with complete protease inhibitor cocktail (Roche). Cell  
560 extracts were sonicated with a Bioruptor TOS-UCW-310-EX (output, 250W; 25 cycles of  
561 sonication with 30-second intervals; Cosmo Bio). Samples were centrifuged at 14,000 rpm  
562 at 4°C for 10 minutes, and the supernatants were diluted 10-fold in dilution buffer (20 mM  
563 Tris-HCl [pH 8.0], 2 mM EDTA, 1% Triton X-100, 150 mM NaCl, and complete protease  
564 inhibitor cocktail). Chromatin samples were precleared with protein A-agarose beads (Santa  
565 Cruz) for 2h before immunoprecipitation against Flag (Sigma-Aldrich) antibodies overnight  
566 at 4 °C. Immune complexes were collected with protein A-agarose beads. Samples were  
567 washed five times (first wash with low salt immune complex wash buffer [20 mM Tris-HCl,  
568 pH.8.0, 2 mM EDTA, 1% Triton X-100, 0.1 % SDS, and 150 mM NaCl], second wash with  
569 high salt immune complex wash buffer [20 mM Tris-HCl, pH.8.0, 2 mM EDTA, 1% Triton  
570 X-100, 0.1% SDS, and 500 mM NaCl], third wash with LiCl immune complex wash buffer  
571 [10 mM Tris-HCl, pH.8.0, 1 mM EDTA, 250 mM LiCl, 1% NP-40, and 1% Na-  
572 deoxycholate], and the last two washes with TE buffer). Immunoprecipitated samples were  
573 eluted with buffer containing 1% SDS and 100 mM NaHCO<sub>3</sub> at room temperature. Eluates  
574 were heated overnight at 65°C to reverse crosslinks after adding NaCl to a final concentration  
575 of 100 mM. Genomic DNA was extracted with a PCR purification kit (GeneAll). Precipitated  
576 chromatin by real-time PCR and the readouts were normalized using 5% input chromatin for  
577 each sample. The experiments were repeated two or more times. Primers were listed in  
578 Supplementary Table 2.

579

#### 580 **Luciferase assay**

581 The mHat9d cells were transiently transfected with 3X DRE-Luc and HA-MAST4  
582 PDZ, 3Flag-DLX3 and series of mutation constructs by Neon Electroporation Transfection

583 system (ThermoFisher). After 24 h, cells were lysed and the luciferase activities were  
584 analyzed using the Luciferase Assay System kit (Promega) according to the manufacturer's  
585 protocol. All assays were done in triplicate, and all values were normalized for transfection  
586 efficiency against  $\beta$ -galactosidase activities.

587

### 588 **Statistics**

589 Data analyses were performed in GraphPad Prism 8.0.2. All statistical analyses used  
590 nonparametric methods, which do not assume an underlying normal distribution in the  
591 data. Unpaired *t*-test was used for comparison of means from two experimental groups. All  
592 numerical bar graphs are represented as mean $\pm$ SD. Throughout the paper, the *p*-values for  
593 the comparisons are given in the figure legends and denoted on the graphs according to the  
594 following key: \**p* $\leq$ 0.05, \*\**p* $\leq$ 0.01, \*\*\**p* $\leq$ 0.001, \*\*\*\**p* $\leq$ 0.0001, non-significant (ns) *p* $>$ 0.05.

595

596 **Data Availability**

597           The RNA-Seq raw datasets are generated as FASTQ format. Total 4 raw data can be  
598 downloaded from the Sequence Read Archive (SRA) under BioProject accession number  
599 PRJNA785577. Reads alignment metadata and processed normalized gene expression data of  
600 RNA-Seq have been deposited in Dryad; <https://doi.org/10.5061/dryad.4b8gthf1>.

601

602 **Conflict of interest**

603 The authors declare no competing interests.

604

605 **Acknowledgement**

606 We are grateful to Mr. S. Kenmotsu and Mr. H. Sano for their technical assistance with  
607 EPMA and micro computed tomography analyses. This work was supported by the National  
608 Research Foundation of Korea (NRF) Grant funded by the Korean Government  
609 (MSIP)(NRF-2019R1A2C3005294). This research was supported by the Bio-&Medical  
610 Technology Development Program of the National Research Foundation (NRF) & funded by  
611 the Korean Government (MSIP&MOHW) (No. 2017M3A9E4048172).

## 612 **References**

- 613 Avery, J.K., Steele, P.F., and Avery, N. (2002). Oral development and histology (Stuttgart, New York,  
614 NY: Thieme)
- 615 Barron, M.J., Brookes, S.J., Kirkham, J., Shore, R.C., Hunt, C., Mironov, A., Kingswell, N.J., Maycock, J.,  
616 Shuttleworth, C.A., and Dixon, M.J. (2010). A mutation in the mouse Amelx tri-tyrosyl domain  
617 results in impaired secretion of amelogenin and phenocopies human X-linked amelogenesis  
618 imperfecta. *Hum Mol Genet* 19, 1230-47.
- 619 Bartlett, J.D., and Smith, C.E. (2013). Modulation of cell-cell junctional complexes by matrix  
620 metalloproteinases. *J Dent Res* 92, 10-7.
- 621 Bryan, J.T., and Morasso, M.I. (2000). The Dlx3 protein harbors basic residues required for nuclear  
622 localization, transcriptional activity and binding to Msx1. *J Cell Sci* 113, 4013-23.
- 623 Chung, J., Khadka, P., and Chung, I.K. (2012). Nuclear import of hTERT requires a bipartite nuclear  
624 localization signal and Akt-mediated phosphorylation. *J Cell Sci* 125, 2684-97.
- 625 Cong, L., Ran, F.A., Cox, D., Lin, S.L., Barretto, R., Habib, N., Hsu, P.D., Wu, X.B., Jiang, W.Y., Marraffini,  
626 L.A., et al. (2013). Multiplex Genome Engineering Using CRISPR/Cas Systems. *Science* 339, 819-823.
- 627 Duverger, O., Lee, D., Hassan, M.Q., Chen, S.X., Jaisser, F., Lian, J.B., and Morasso, M.I. (2008).  
628 Molecular consequences of a frameshifted DLX3 mutant leading to Tricho-Dento-Osseous  
629 syndrome. *J Biol Chem* 283, 20198-208.
- 630 Duverger, O., Ohara, T., Bible, P.W., Zah, A., and Morasso, M.I. (2017). DLX3-Dependent Regulation  
631 of Ion Transporters and Carbonic Anhydrases is Crucial for Enamel Mineralization. *J Bone Miner  
632 Res* 32, 641-653.
- 633 Garland, P., Quraishe, S., French, P., and O'Connor, V. (2008). Expression of the MAST family of  
634 serine/threonine kinases. *Brain Res* 1195, 12-9.
- 635 Gongol, B., Marin, T.L., Jeppson, J.D., Mayagoitia, K., Shin, S., Sanchez, N., Kirsch, W.M., Vinters, H.V.,  
636 Wilson, C.G., Ghribi, O., et al. (2017). Cellular hormetic response to 27-hydroxycholesterol  
637 promotes neuroprotection through AICD induction of MAST4 abundance and kinase activity. *Sci  
638 Rep* 7, 13898.
- 639 Greco, T.M., Yu, F., Guise, A.J., and Cristea, I.M. (2011). Nuclear import of histone deacetylase 5 by  
640 requisite nuclear localization signal phosphorylation. *Mol Cell Proteomics* 10, M110 004317.
- 641 Harada, H., Toyono, T., Toyoshima, K., Yamasaki, M., Itoh, N., Kato, S., Sekine, K., and Ohuchi, H.  
642 (2002). FGF10 maintains stem cell compartment in developing mouse incisors. *Development* 129,  
643 1533-41.
- 644 Hu, J.C., and Simmer, J.P. (2007). Developmental biology and genetics of dental malformations.  
645 *Orthod Craniofac Res* 10, 45-52.
- 646 Hwang, J., Mehrani, T., Millar, S.E., and Morasso, M.I. (2008). Dlx3 is a crucial regulator of hair  
647 follicle differentiation and cycling. *Development* 135, 3149-3159.
- 648 Hyun, H.K., and Kim, J.W. (2009). Thickness and microhardness of deciduous tooth enamel with

649 known DLX3 mutation. Arch Oral Biol 54, 830-4.  
650 Iwasaki, K., Bajenova, E., Somogyi-Ganss, E., Miller, M., Nguyen, V., Nourkeyhani, H., Gao, Y., Wendel,  
651 M., and Ganss, B. (2005). Amelotin--a Novel Secreted, Ameloblast-specific Protein. J Dent Res 84,  
652 1127-32.  
653 Kang, H.Y., Seymen, F., Lee, S.K., Yildirim, M., Tuna, E.B., Patir, A., Lee, K.E., and Kim, J.W. (2009).  
654 Candidate gene strategy reveals ENAM mutations. J Dent Res 88, 266-9.  
655 Kretzschmar, K., and Clevers, H. (2017). Wnt/beta-catenin signaling in adult mammalian epithelial  
656 stem cells. Dev Biol 428, 273-282.  
657 Landoulsi, Z., Laatar, F., Noe, E., Mrabet, S., Ben Djebara, M., Achaz, G., Nava, C., Baulac, S., Kacem,  
658 I., Gargouri-Berrechid, A., et al. (2018). Clinical and genetic study of Tunisian families with genetic  
659 generalized epilepsy: contribution of CACNA1H and MAST4 genes. Neurogenetics 19, 165-178.  
660 Lee, S.-J., Park, J., Lee, D.-J., Otsu, K., Kim, P., Mizuno, S., Lee, M.-J., Kim, H.-Y., Harada, H., Takahashi,  
661 S., et al. (2020). Mast4 knockout shows the regulation of spermatogonial stem cell self-renewal via  
662 the FGF2/ERM pathway. Cell Death & Differentiation.  
663 Lee, S.K., Lee, Z.H., Lee, S.J., Ahn, B.D., Kim, Y.J., Lee, S.H., and Kim, J.W. (2008). DLX3 mutation in a  
664 new family and its phenotypic variations. J Dent Res 87, 354-7.  
665 Li, H., Jeong, H.M., Choi, Y.H., Kim, J.H., Choi, J.K., Yeo, C.Y., Jeong, H.G., Jeong, T.C., Chun, C., and  
666 Lee, K.Y. (2014). Protein kinase a phosphorylates Dlx3 and regulates the function of Dlx3 during  
667 osteoblast differentiation. J Cell Biochem 115, 2004-11.  
668 Logan, C.Y., and Nusse, R. (2004). The Wnt signaling pathway in development and disease. Annu  
669 Rev Cell Dev Biol 20, 781-810.  
670 Lu, Y., Papagerakis, P., Yamakoshi, Y., Hu, J.C., Bartlett, J.D., and Simmer, J.P. (2008). Functions of  
671 KLK4 and MMP-20 in dental enamel formation. Biol Chem 389, 695-700.  
672 MacDougall, M., Simmons, D., Dodds, A., Knight, C., Luan, X., Zeichner-David, M., Zhang, C., Ryu,  
673 O.H., Qian, Q., Simmer, J.P., et al. (1998). Cloning, characterization, and tissue expression pattern of  
674 mouse tuftelin cDNA. J Dent Res 77, 1970-8.  
675 Moffatt, P., Smith, C.E., St-Arnaud, R., and Nanci, A. (2008). Characterization of Apin, a secreted  
676 protein highly expressed in tooth-associated epithelia. J Cell Biochem 103, 941-56.  
677 Moffatt, P., Smith, C.E., St-Arnaud, R., Simmons, D., Wright, J.T., and Nanci, A. (2006). Cloning of rat  
678 amelotin and localization of the protein to the basal lamina of maturation stage ameloblasts and  
679 junctional epithelium. Biochem J 399, 37-46.  
680 Muto, T., Miyoshi, K., Horiguchi, T., Hagita, H., and Noma, T. (2012). Novel genetic linkage of rat  
681 Sp6 mutation to Amelogenesis imperfecta. Orphanet J Rare Dis 7, 34.  
682 Nanci, A. (2017). Ten Cate's Oral Histology-E-Book: Development, Structure, and Function Elsevier  
683 Health Sciences)  
684 Nardozi, J.D., Lott, K., and Cingolani, G. (2010). Phosphorylation meets nuclear import: a review.  
685 Cell Commun Signal 8, 32.  
686 Nusse, R. (2008). Wnt signaling and stem cell control. Cell Res 18, 523-7.



- 687 Park, G.T., Denning, M.F., and Morasso, M.I. (2001). Phosphorylation of murine homeodomain  
688 protein Dlx3 by protein kinase C. *FEBS Lett* 496, 60-5.
- 689 Rattanawarawipa, P., Pavasant, P., Osathanon, T., and Sukarawan, W. (2016). Effect of lithium  
690 chloride on cell proliferation and osteogenic differentiation in stem cells from human exfoliated  
691 deciduous teeth. *Tissue Cell* 48, 425-31.
- 692 Ring, A., Kim, Y.M., and Kahn, M. (2014). Wnt/catenin signaling in adult stem cell physiology and  
693 disease. *Stem Cell Rev Rep* 10, 512-25.
- 694 Roskoski, R. (2015). A historical overview of protein kinases and their targeted small molecule  
695 inhibitors. *Pharmacol Res* 100, 1-23.
- 696 Seidel, K., Ahn, C.P., Lyons, D., Nee, A., Ting, K., Brownell, I., Cao, T., Carano, R.A., Curran, T., Schober,  
697 M., et al. (2010). Hedgehog signaling regulates the generation of ameloblast progenitors in the  
698 continuously growing mouse incisor. *Development* 137, 3753-61.
- 699 Shin, M., Suzuki, M., Guan, X., Smith, C.E., and Bartlett, J.D. (2016). Murine matrix  
700 metalloproteinase-20 overexpression stimulates cell invasion into the enamel layer via enhanced  
701 Wnt signaling. *Sci Rep* 6, 29492.
- 702 Simmer, J.P., Richardson, A.S., Wang, S.K., Reid, B.M., Bai, Y., Hu, Y., and Hu, J.C. (2014). Ameloblast  
703 transcriptome changes from secretory to maturation stages. *Connect Tissue Res* 55 Suppl 1, 29-32.
- 704 Stephanopoulos, G., Garefalaki, M.E., and Lyroudia, K. (2005). Genes and related proteins involved  
705 in amelogenesis imperfecta. *J Dent Res* 84, 1117-26.
- 706 Sun, L., Gu, S., Li, X., Sun, Y., Zheng, D., Yu, K., Ji, C., Tang, R., Xie, Y., and Mao, Y. (2006).  
707 [Identification of a novel human MAST4 gene, a new member of the microtubule associated  
708 serine-threonine kinase family]. *Mol Biol (Mosk)* 40, 808-15.
- 709 Sun, S., Yu, M., Fan, Z., Yeh, I.T., Feng, H., Liu, H., and Han, D. (2019). DLX3 regulates osteogenic  
710 differentiation of bone marrow mesenchymal stem cells via Wnt/beta-catenin pathway mediated  
711 histone methylation of DKK4. *Biochem Biophys Res Commun* 516, 171-176.
- 712 Trapnell, C., Pachter, L., and Salzberg, S.L. (2009). TopHat: discovering splice junctions with RNA-  
713 Seq. *Bioinformatics* 25, 1105-1111.
- 714 Trapnell, C., Williams, B.A., Pertea, G., Mortazavi, A., Kwan, G., van Baren, M.J., Salzberg, S.L., Wold,  
715 B.J., and Pachter, L. (2010). Transcript assembly and quantification by RNA-Seq reveals unannotated  
716 transcripts and isoform switching during cell differentiation. *Nat Biotechnol* 28, 511-U174.
- 717 Xu, Z., Robitaille, A.M., Berndt, J.D., Davidson, K.C., Fischer, K.A., Mathieu, J., Potter, J.C., Ruohola-  
718 Baker, H., and Moon, R.T. (2016). Wnt/beta-catenin signaling promotes self-renewal and inhibits  
719 the primed state transition in naive human embryonic stem cells. *Proc Natl Acad Sci U S A* 113,  
720 E6382-E6390.
- 721 Yan, W.J., Ma, P., Tian, Y., Wang, J.Y., Qin, C.L., Feng, J.Q., and Wang, X.F. (2017). The importance of a  
722 potential phosphorylation site in enamelin on enamel formation. *Int J Oral Sci* 9, e4.
- 723 Yang, Y., Li, Z., Chen, G., Li, J., Li, H., Yu, M., Zhang, W., Guo, W., and Tian, W. (2018). GSK3beta  
724 regulates ameloblast differentiation via Wnt and TGF-beta pathways. *J Cell Physiol* 233, 5322-5333.

725 Ye, L., MacDougall, M., Zhang, S., Xie, Y., Zhang, J., Li, Z., Lu, Y., Mishina, Y., and Feng, J.Q. (2004).  
726 Deletion of dentin matrix protein-1 leads to a partial failure of maturation of predentin into dentin,  
727 hypomineralization, and expanded cavities of pulp and root canal during postnatal tooth  
728 development. *J Biol Chem* 279, 19141-8.

729 Zhan, Y., Li, X., Gou, X., Yuan, G., Fan, M., and Yang, G. (2018). DLX3 Inhibits the Proliferation of  
730 Human Dental Pulp Cells Through Inactivation of Canonical Wnt/beta-Catenin Signaling Pathway.  
731 *Front Physiol* 9, 1637.

732 Zhang, Z., Tian, H., Lv, P., Wang, W., Jia, Z., Wang, S., Zhou, C., and Gao, X. (2015). Transcriptional  
733 factor DLX3 promotes the gene expression of enamel matrix proteins during amelogenesis. *PLoS*  
734 *One* 10, e0121288.

735 Zhao, N., Han, D., Liu, H., Li, Y., Wong, S.W., Cao, Z., Xu, J., Zhang, X., Cai, T., Wang, Y., et al. (2016).  
736 Senescence: novel insight into DLX3 mutations leading to enhanced bone formation in Tricho-  
737 Dento-Osseous syndrome. *Sci Rep* 6, 38680.

738

739 **Figure Legends**

740

741 **Figure 1. Deletion of *Mast4* leads to amelogenesis imperfecta phenotype**

742 (A) Structure of the *Mast4* KO allele. The mouse *Mast4* locus is depicted with exons as boxes.  
743 A new stop codon is generated in the first exon of mRNA after the 71 bp nucleotides are  
744 deleted. (B-E) Comparison of 6-week and 18-week WT and *Mast4* KO incisors. Bent  
745 maxillary and mandibular incisors are observed in *Mast4* KO mice. An arrow indicates the  
746 peeled enamel in 6-week *Mast4* KO maxillary incisor. (F, G) Micro-computed tomography  
747 three-dimensional (3D) reconstruction of the *Mast4* KO mouse shows that the incisor is  
748 severely curved. (H, I) Scanning electron microscope (SEM) images of incisor enamel  
749 dissected planes. Decussated enamel rods are observed in the inner enamel layer of the WT  
750 incisor. Enamel rod arrangement is collapsed in the *Mast4* KO incisor (arrows). (J) Vickers  
751 microhardness test shows that *Mast4* KO incisors are weaker than WT incisors (N=20 per  
752 group, biological replication, detail replication information is described in materials and  
753 methods section). Statistical significance was determined with an unpaired *t*-test. *p*-values are:  
754 Maxilla=0.0037, Mandible<0.0001. (K-P) MAST4 localization in the WT incisors. The  
755 dotted lines indicate the boundary of the apical bud. (K-M) In the 3-week incisor, MAST4 is  
756 observed at distal terminal web complexes at secretory and maturation stage ameloblasts  
757 (arrows). (N) In 6 weeks, MAST4 expression is extended to the apical side (asterisks). (O)  
758 MAST4 is localized at both sides (proximal and distal) of terminal web complexes (arrows)  
759 and Tomes' processes (arrowheads) in the secretory stage ameloblasts. (P) In the maturation  
760 stage of ameloblasts, MAST4 is observed at the ruffled border (arrowheads) and proximal  
761 terminal web complexes (arrows).

762 Am, ameloblast; SI, stratum intermedium; Scale bars; H, I, 10  $\mu$ m; K-P, 100  $\mu$ m.

763

764 **Figure 1 - Figure supplement 1. Molar development is not affected by the ablation of**  
765 ***Mast4*.**

766 (A, B, D, E) Mandibular molar tooth germ of E18.5 WT and *Mast4* KO mice. Bell-stage  
767 tooth germs have elongated and well-aligned ameloblast layers. (E arrowheads) Several  
768 defects in ameloblast alignment of *Mast4* KO tooth germ. (C, F) Mandibular bone and teeth  
769 of 10 weeks WT and *Mast4* KO mice after soft tissue removal. Contrary to the difference in  
770 length and direction of incisors, no difference was found between the WT and *Mast4* KO

771 molars. Am; ameloblast, DP; dental papilla, Od; odontoblast, Mn; mandible, scale bars; B, E,  
772 200  $\mu$ m.

773

774 **Figure 1 - Figure supplement 2. Mineral density of mandibular incisors.**

775 (A, B) Electron probe microanalyzer (EPMA) analysis of 6-week mandibular incisors. The  
776 mineral composition of the enamel is decreased in the *Mast4* KO incisors. Numbers in  
777 addition to the indicator bars are mineral intensity (a.u.). The area % values show the three  
778 most measured intensity ranges. BEI; backscattered electron image, Ca; calcium, P;  
779 phosphorus, Mg; magnesium. Scale bars; A, B, 50  $\mu$ m.

780

781

782 **Figure 2. Reduced apical bud region and accelerated ameloblast differentiation in the**  
783 ***Mast4* KO incisor**

784 (A, B) HE stained images in 3-week WT and *Mast4* KO incisors. Arrowheads indicate the  
785 initiation position of enamel deposition. (B) In contrast to the WT incisor, detachment is  
786 observed in the ameloblasts and enamel of *Mast4* KO incisors (asterisks). The enamel  
787 deposition is moved to apical. In the maturation stage, hypomineralization is detected in the  
788 *Mast4* KO incisor. (C, D) HE stained images in 6-week WT and *Mast4* KO incisors. (C)  
789 After decalcification, the enamel in the WT maturation stage contains less enamel matrix  
790 protein than (D) the enamel in the *Mast4* KO maturation stage (arrows). In terms of the  
791 amelogenesis stages, early enamel deposition is observed in the *Mast4* KO incisor compared  
792 to the WT incisor. The enamel is detached from ameloblasts in the apical bud and secretory  
793 stage of the *Mast4* KO incisor (D asterisks). (E, F) Ameloblastin (AMBN) localization in 3-  
794 week WT and *Mast4* KO incisor. (F) AMBN is expressed and released to the enamel layer on  
795 the apical side in the *Mast4* KO incisor compared to the WT. An arrowhead indicates the  
796 initiation position of enamel deposition. (G) Schematic figures of mandibular labial incisor  
797 epithelium in WT and *Mast4* KO mouse. In the mandibular incisor of the *Mast4* KO mouse,  
798 the labial apical bud including SR and IDE is reduced. TA region is not shown and the  
799 initiation of enamel deposition is shifted to the reduced apical bud.

800 D; dentin, E; enamel, Am; ameloblast, Od; odontoblast, sec.Am; secretory ameloblast,  
801 mat.Am; maturative Ameloblast, preAm; Preameloblast, IDE; inner dental epithelium, ODE;

802 outer dental epithelium, SR; stellate reticulum, TA; transit-amplifying zone. All scale bars;  
803 100  $\mu$ m.

804

805 **Figure 2 - Figure supplement 1. Labial cervical loops of mandibular incisors are**  
806 **exposed.**

807 Under a stereoscopic dissecting microscope, mandibles of 6-week WT and *Mast4* KO mice  
808 are dissected to expose the apical buds. (A) In the WT mandibular incisor, initiation of the  
809 enamel matrix was observed after the TA zone. (B) However, the initiation of enamel in the  
810 *Mast4* KO incisor was shifted to the apical side, and the cervical loop was reduced compared  
811 to the WT. Dotted lines; margin of apical buds, E; enamel, DP; dental papilla, sec.Am;  
812 secretory Ameloblast, preAm; Preameloblast, IDE; inner dental epithelium, ODE; outer  
813 dental epithelium, SR; stellate reticulum, SI; stratum intermedium, TA; transit-amplifying  
814 zone. Scale bars; A, B, 250  $\mu$ m.

815

816

817 **Figure 3. Enamel maturation dysregulation in the *Mast4* KO incisor.**

818 (A-H) Enamel matrix protein (MMP20) and maturation-related protein (FAM83H) in the  
819 secretory and maturation region of 6-week WT and *Mast4* KO incisors. Arrowheads indicate  
820 ameloblasts expressing MMP20 and FAM83H. Arrows indicate the expression of the enamel  
821 matrix. (A, B) In the secretory region, the expression of MMP20 is similar between WT and  
822 *Mast4* KO. (C, D) FAM83H expression is increased in *Mast4* KO. (E-H) In the maturation  
823 region, MMP20 and FAM83H expression is decreased in ameloblasts as well as enamel  
824 matrix at *Mast4* KO. (I) RNA-Seq analyses using apical bud and secretory ameloblasts from  
825 both the 6-week WT and *Mast4* KO incisor. At apical bud, the expression of *Perp*, *Klk4*,  
826 *Enam* (*Enamelin*) and *Mmp20* is increased in the *Mast4* KO. At the ameloblast region, the  
827 expression of *Fam83h*, *Dlx3* and *Wdr72* are increased in the *Mast4* KO.  
828 D; dentin, E; enamel, Am; ameloblast, Scale bar; 50  $\mu$ m.

829

830

831 **Figure 4. Disruption of stem cell maintenance and *Wnt* signaling pathways in the *Mast4***  
832 **KO.**

833 (A-D) RNA-Seq analyses using apical bud and ameloblasts from both the WT and *Mast4* KO  
834 incisor. (A, C) Heatmaps show that canonical *Wnt*-related genes are downregulated in both  
835 *Mast4* KO apical bud and ameloblast. Stem cell maintenance related genes are also  
836 downregulated in the *Mast4* KO incisor. (B, D) GO analyses at both the apical bud and  
837 ameloblast, the canonical *Wnt* signaling pathways are downregulated in the *Mast4* KO incisor.  
838 (E) Western blot of  $\beta$ -catenin and its quantification in mHat9d cell line after KO Lentivirus  
839 infection (N=4, independent technical replication). Quantification was performed by  
840 measuring signal intensities of blot images using ImageJ software and normalized with  
841 intensity values of Histone H3 for nucleus and GAPDH for cytoplasm.  $\beta$ -catenin expression  
842 in the nucleus and cytoplasm is decreased in the *Mast4* KO cells. Statistical significance was  
843 determined with an unpaired *t*-test. *p*-values are: nucleus <0.0001, cytoplasm <0.0001. (F)  
844 RT-qPCR analysis of the expression of *Wnt-3a*,  *$\beta$ -catenin* and *Lrp5* in mHat9d cells (N=3,  
845 technical replication). Expression of *Wnt*-related genes is reduced after *Mast4* KO in the  
846 mHat9d cells. *p*-values (unpaired *t*-test) are: *Wnt-3a*=0.0483,  *$\beta$ -catenin*=0.0016, *Lrp5*=0.0014.

847

848

849 **Figure 5. MAST4 regulates translocation of DLX3 by inducing phosphorylation near**  
850 **the NLS region.**

851 (A-D) DLX3 localization in 6-week WT and *Mast4* KO incisors. Arrowheads indicate that  
852 DLX3 is localized in the nucleus. Arrows point to the nuclei without DLX3. (A) In WT,  
853 DLX3 is localized in the nucleus of the secretory stage ameloblast (arrowheads). (B) DLX3 is  
854 observed in both the nucleus and the cytoplasm (arrowheads). (C) In *Mast4* KO, DLX3 is  
855 distributed in both the nucleus and cytoplasm of ameloblasts in the secretory region. (D) In  
856 the maturation stage, DLX3 is localized in the cytoplasm, not in the nucleus (arrows). (E, F)  
857 Analysis of DLX3 expression using subcellular fractionation in both PDZ domain  
858 overexpressing mHat9d stable cell line and transient transfection in HEK293T. The  
859 expression of  $\alpha$ -tubulin in the cytoplasm and Lamin B in the nucleus served as controls for  
860 the efficiency of subcellular fractionation. (G) Immunoprecipitation assay conducted using  
861 HEK293T cells. (H, I) Flag-DLX3 was immunoprecipitated, and the complexes were  
862 analyzed by western blot. Note that DLX3 phosphorylation is increased in the presence of  
863 MAST4 in mHat9d (H) and HEK293T cells (I). (J) HA-MAST4 PDZ and various deletion  
864 mutants of *Dlx3* were co-transfected into HEK293T cells, followed by immunoprecipitation  
865 assay. Note that MAST4 binds to the C-terminal of the ND domain. (K) Scheme showing the  
866 entire deletion of *Dlx3*. Note that NLS is located in 124-150 aa. (L) Flag-DLX3<sup>WT</sup>, DLX3<sup>AAA</sup>  
867 mutant and HA-MAST4 PDZ were transiently co-transfected into HEK293T cells. Flag-  
868 DLX3 was immunoprecipitated, and the complexes were analyzed by western blot. Note that  
869 DLX3 phosphorylation is increased in the presence of MAST4. (M) Flag-DLX3<sup>WT</sup>,  
870 DLX3<sup>AAA</sup> mutant and HA-Mast4 PDZ were transiently co-transfected into HEK293T cells  
871 and subcellular fractionation was performed. Note that the DLX3<sup>AAA</sup> mutant has a high  
872 proportion in the cytoplasm and is not regulated by MAST4 compared to DLX3<sup>WT</sup>.  
873 NLS; nuclear localization signal, ND; N-terminal domain, HD; homeodomain, CD; C-  
874 terminal domain, Scale bars; A, B, E, F, 40  $\mu$ m.

875

876 **Figure 5 – Source data 1. Uncropped blot images used to generate panels Figure 5E-J.**

877

878 **Figure 5 – Source data 2. Uncropped blot images used to generate panels Figure 5L, M.**

879



880 **Figure 6. NLS phosphorylation of DLX3 by MAST4 regulates activation of target genes**  
881 **involved in pH regulation.**

882 (A) 3x DRE-luc, DLX3, and MAST4 PDZ were transiently overexpressed in the mHat9d  
883 cells and beta-galactosidase was co-transfected for normalization. Luciferase activities were  
884 measured after 48 h (N=3 per group, technical replication). Statistical significance was  
885 determined with an unpaired *t*-test. *p*-values are: DLX3<sup>WT</sup>=0.0013, DLX3<sup>AAA</sup>=0.0009. (B-F)  
886 DLX3<sup>WT</sup>, DLX3<sup>AAA</sup> and HA-MAST4 PDZ were transiently transfected in the HEK293T cells.  
887 ChIP assay shows that DLX3<sup>WT</sup> increased target gene promoter binding and HA-MAST4  
888 PDZ co-transfection further increased whereas DLX3<sup>AAA</sup> has no significance (N=3 per group,  
889 technical replication). *p*-values (unpaired *t*-test) are: *CA6* DLX3<sup>WT</sup>=0.0028,  
890 DLX3<sup>AAA</sup>=0.1458; *CA12* DLX3<sup>WT</sup>=0.0454, DLX3<sup>AAA</sup>=0.8724; *CFTR* DLX3<sup>WT</sup>=0.0247,  
891 DLX3<sup>AAA</sup>=0.8934; *SLC24A1* DLX3<sup>WT</sup>=0.0021, DLX3<sup>AAA</sup>=0.4967; *SLC26A1*  
892 DLX3<sup>WT</sup>=0.0041, DLX3<sup>AAA</sup>=0.2732. (B-D) Carbonic anhydrases. (E, F) Ion transporters. (G)  
893 RT-PCR of carbonic anhydrases and ion transporters involved in pH regulation.

894

895 **Figure 6 – Source data 1. Measurement data of Luciferase assay of panels Figure 6A.**

896

897 **Figure 6 – Source data 2. Measurement data of ChIP assay of panels Figure 6B-F.**

898

899 **Figure 6 – Source data 3. Uncropped gel images used to generate panel Figure 6G.**

900

901 **Figure 7. MAST4 regulates amelogenesis in different ways spatiotemporally.**

902 (A) MAST4 acts as a stem cell maintenance mediator in incisor apical bud. Whang et al.  
903 reported that DLX3 is a downstream target of the *Wnt* signaling pathway. Our RNA  
904 sequencing data show that the canonical *Wnt* signaling-related genes are down-regulated in  
905 *Mast4* KO incisor tissues. MAST4 functions as a kinase of DLX3 in ameloblasts during  
906 enamel maturation via controlling DLX3 nuclear localization. It is well known that *Dlx3* is an  
907 Amelogenesis Imperfecta (AI)-related gene. Zhang et al. and Duverger et al. reported that  
908 DLX3 regulates the secretion of enamel matrix proteins and enamel maturation proteins by  
909 functioning as a transcription factor of those matrix proteins. RNA sequencing data show that  
910 *Mast4* regulated *Dlx3*-related enamel matrix and maturation genes. (B) DLX3 controls the  
911 expression of pH regulators, one of the critical factors of enamel maturation. Simmer et al.  
912 reported DLX3 regulates the expression of carbonic anhydrases and ion transporters which  
913 are essential for enamel maturation. Luciferase assay and ChIP data show that carbonic  
914 anhydrases and ion transporters are downregulated in *Mast4* KO. Spatiotemporally proper  
915 regulation of *Wnt* and DLX3 localization by MAST4 is a key mechanism of stem cell  
916 maintenance, differentiation and acquiring physical properties of ameloblast products.

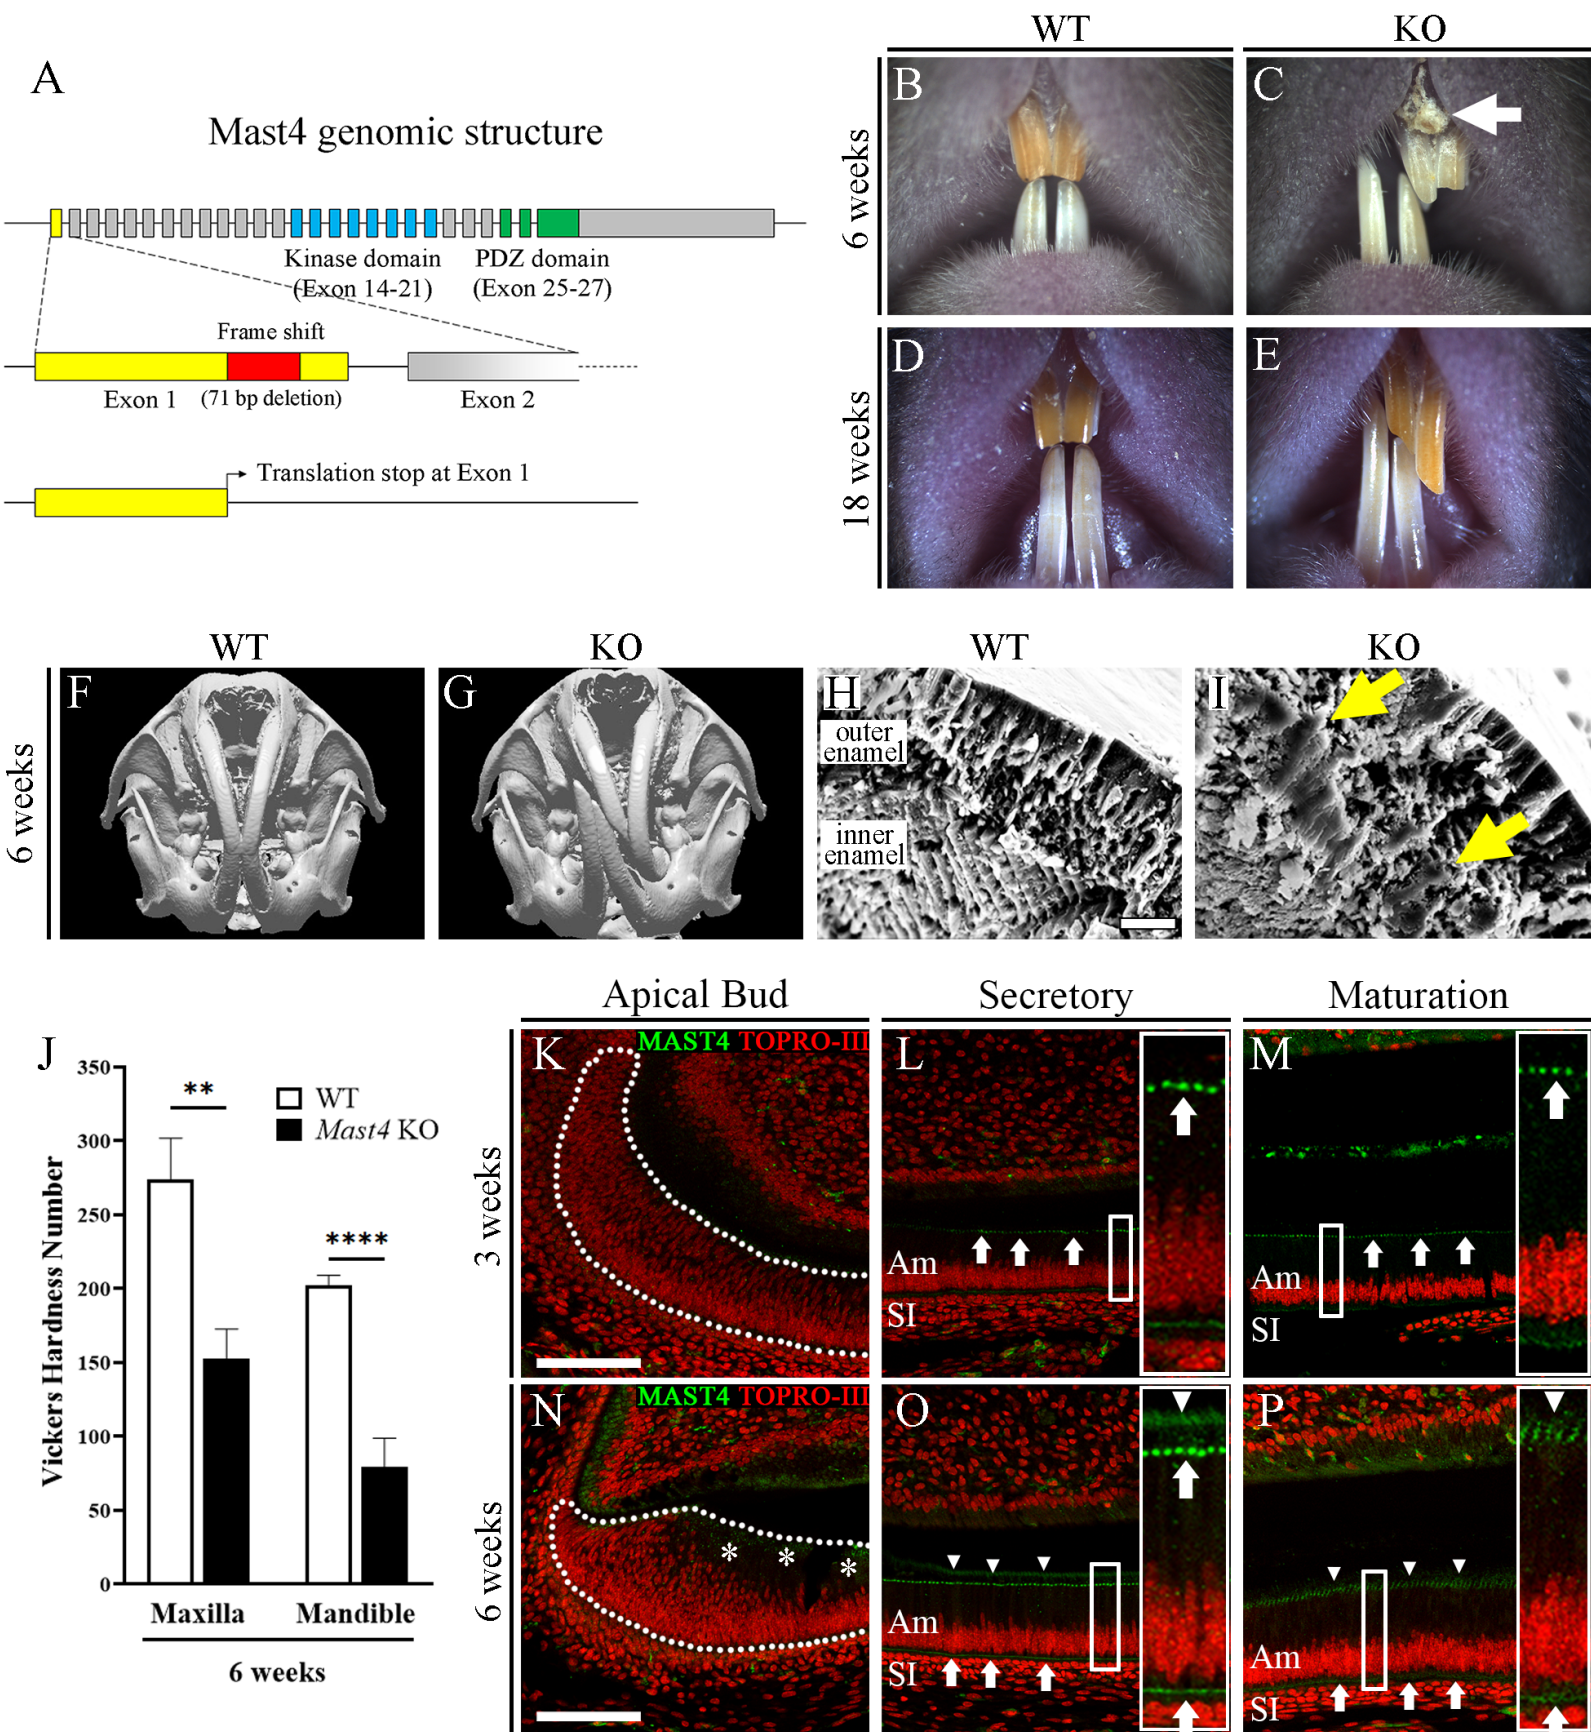



E18.5 days

10 weeks

WT

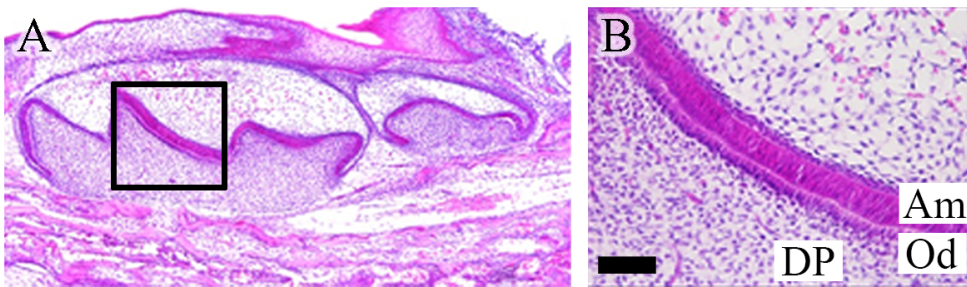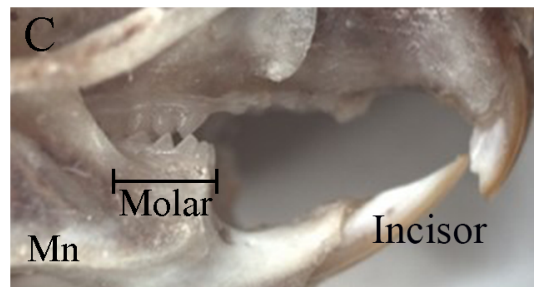

KO

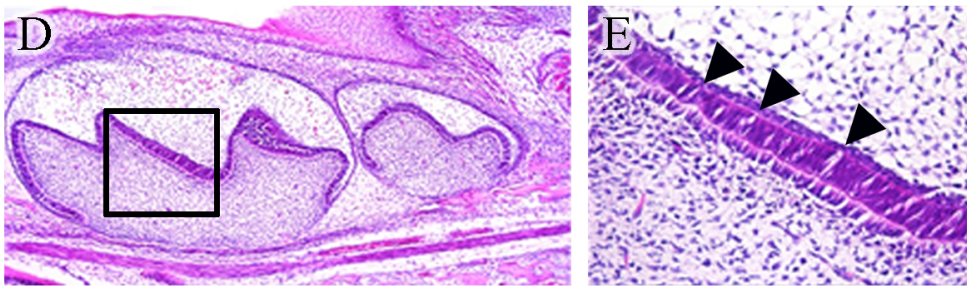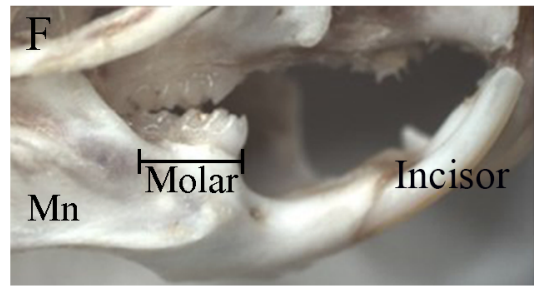

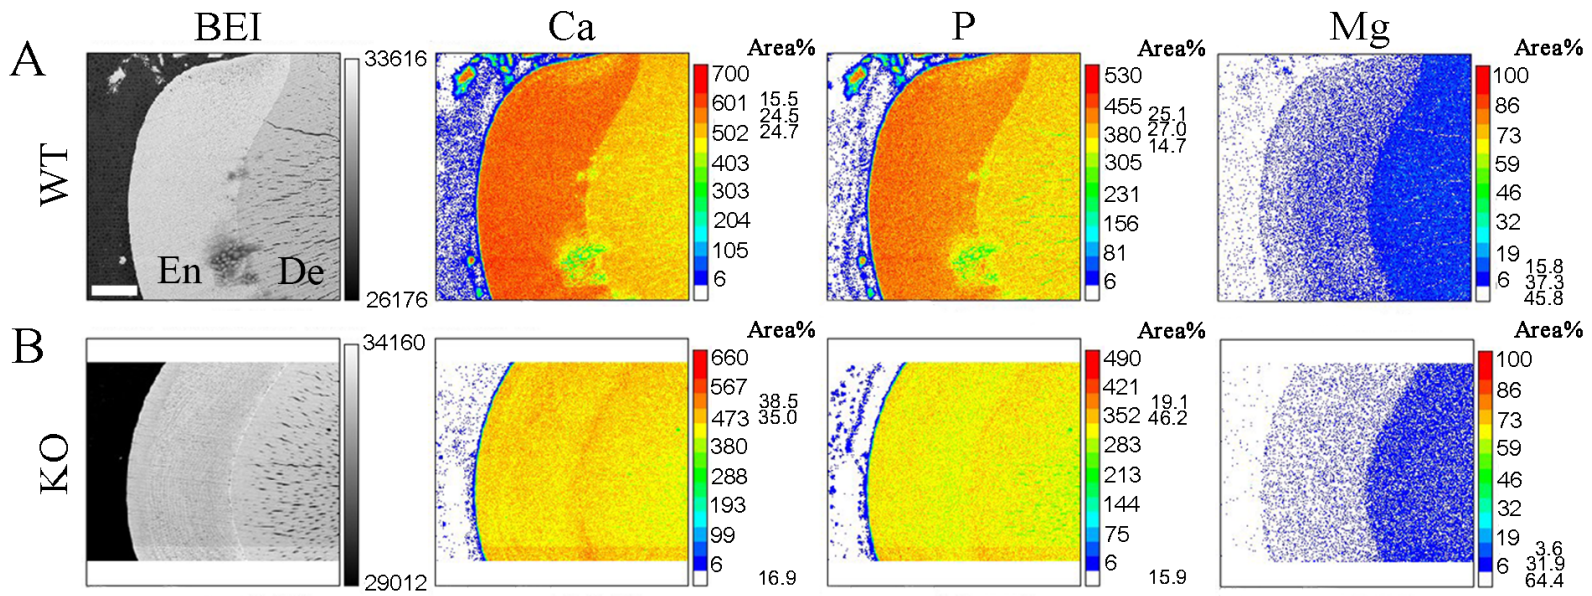





6 weeks

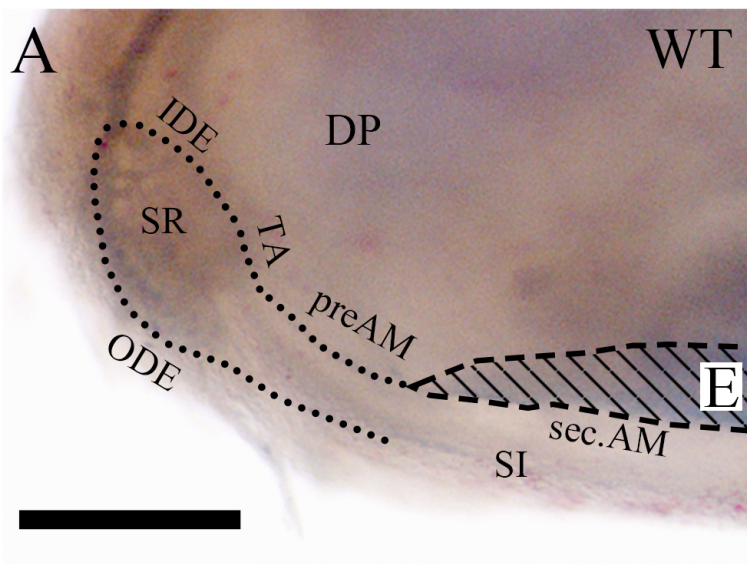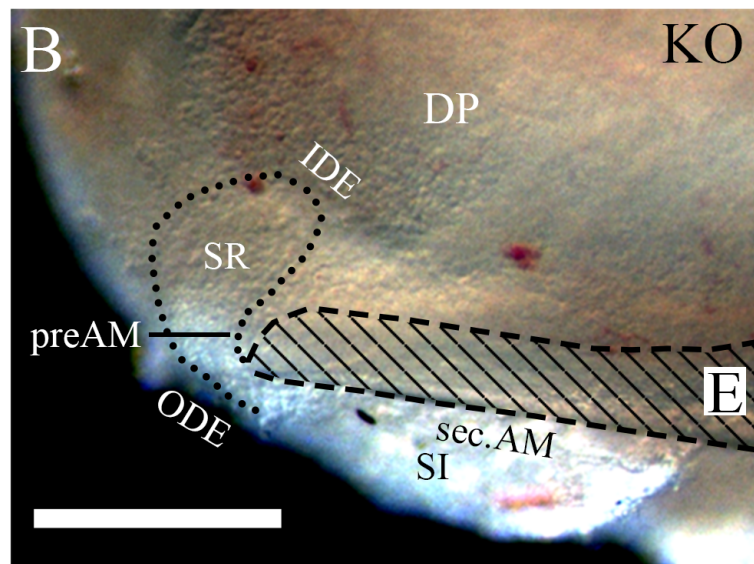



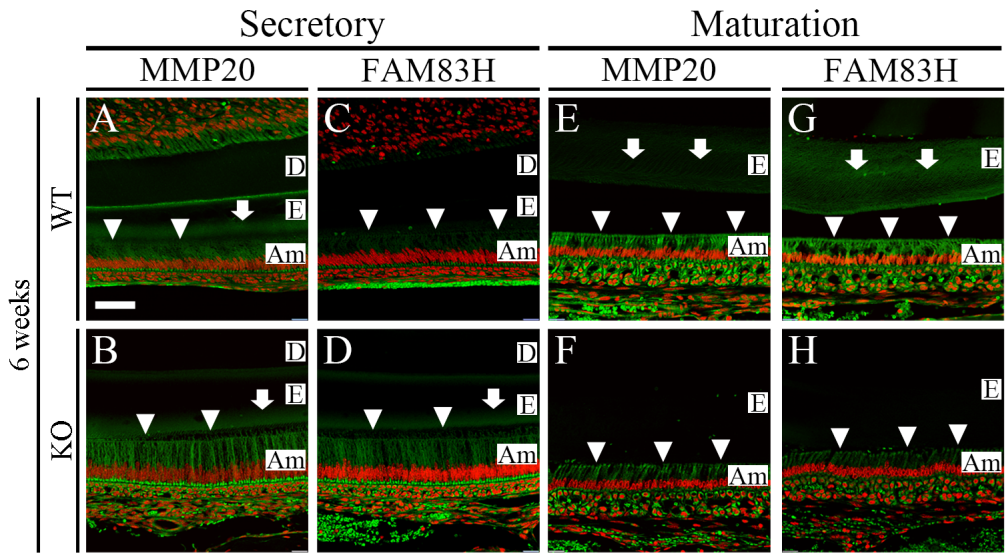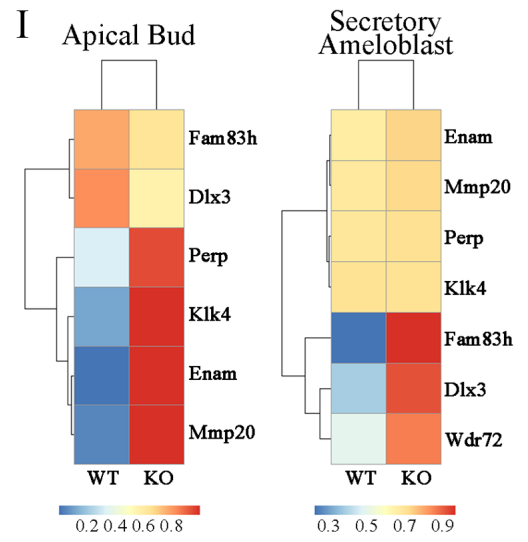

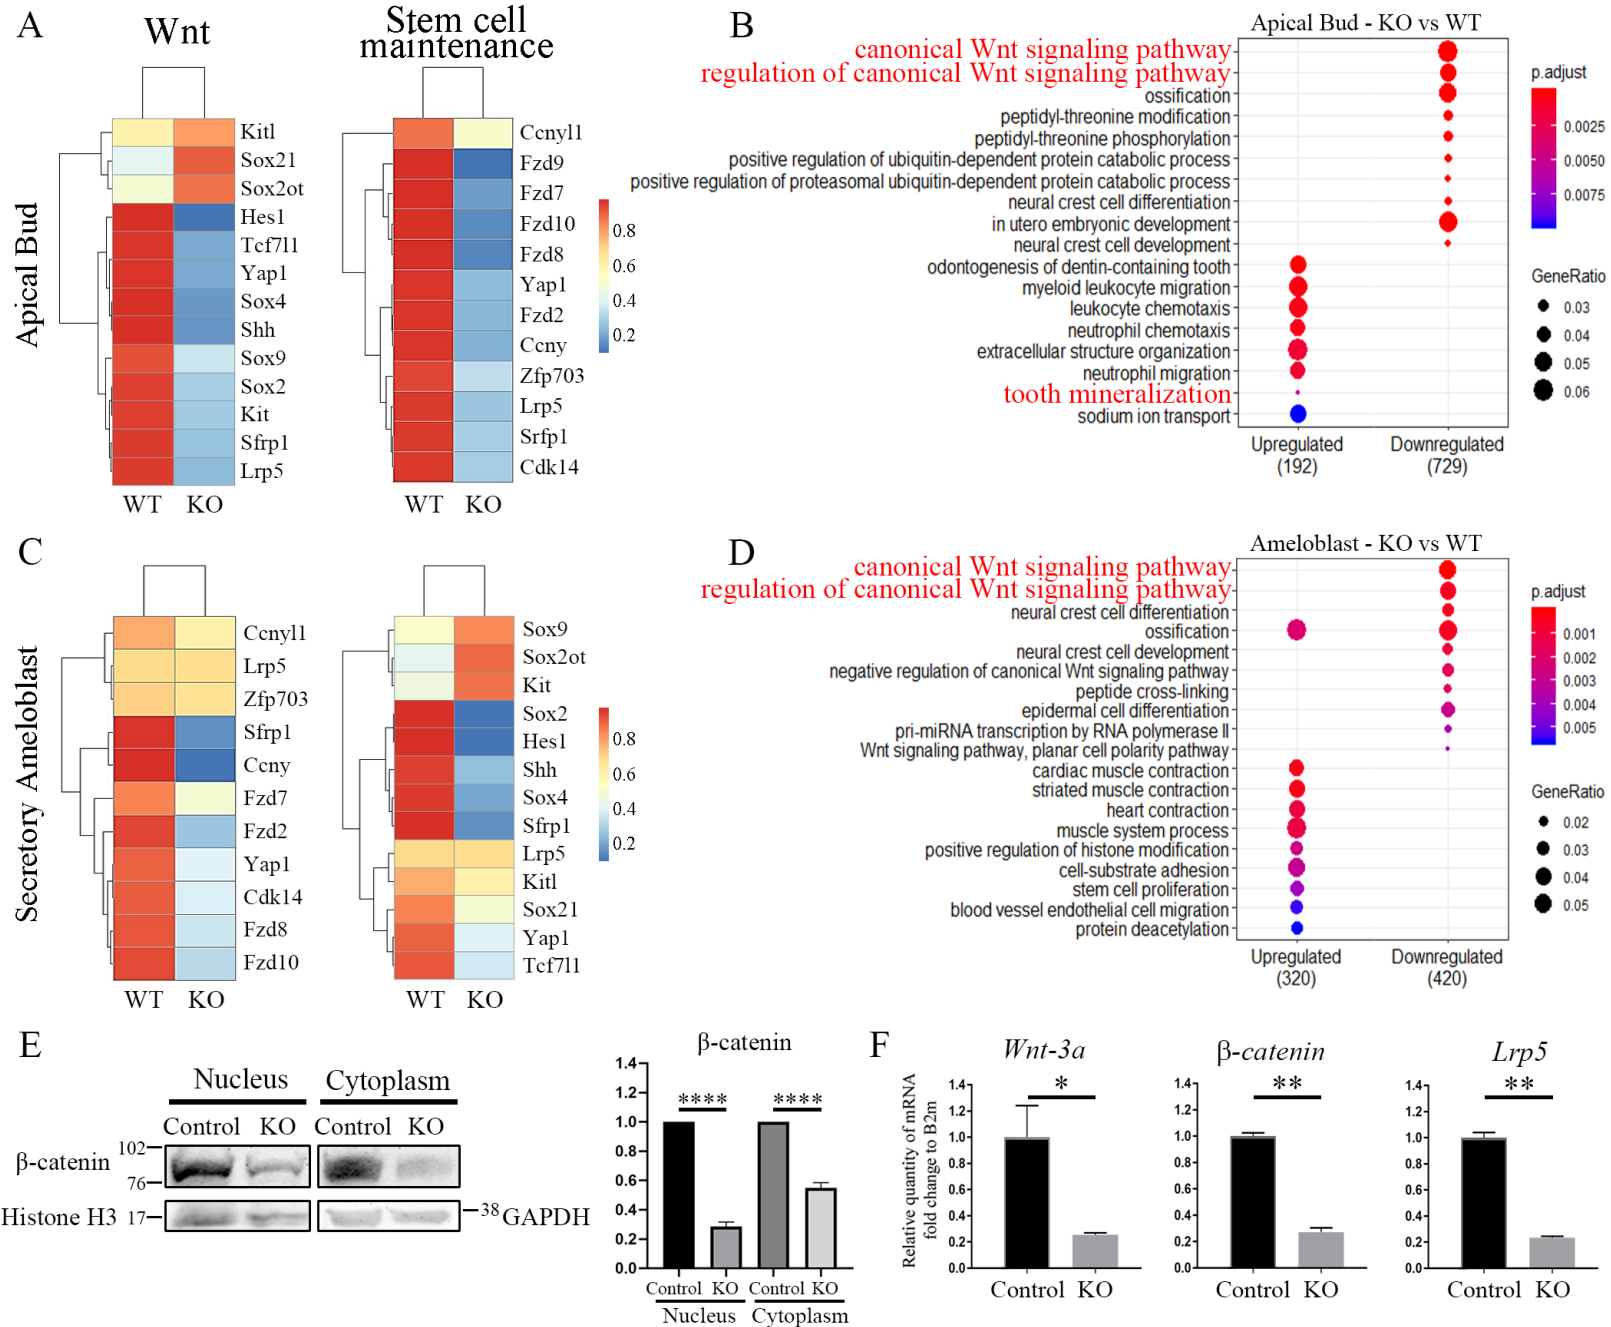



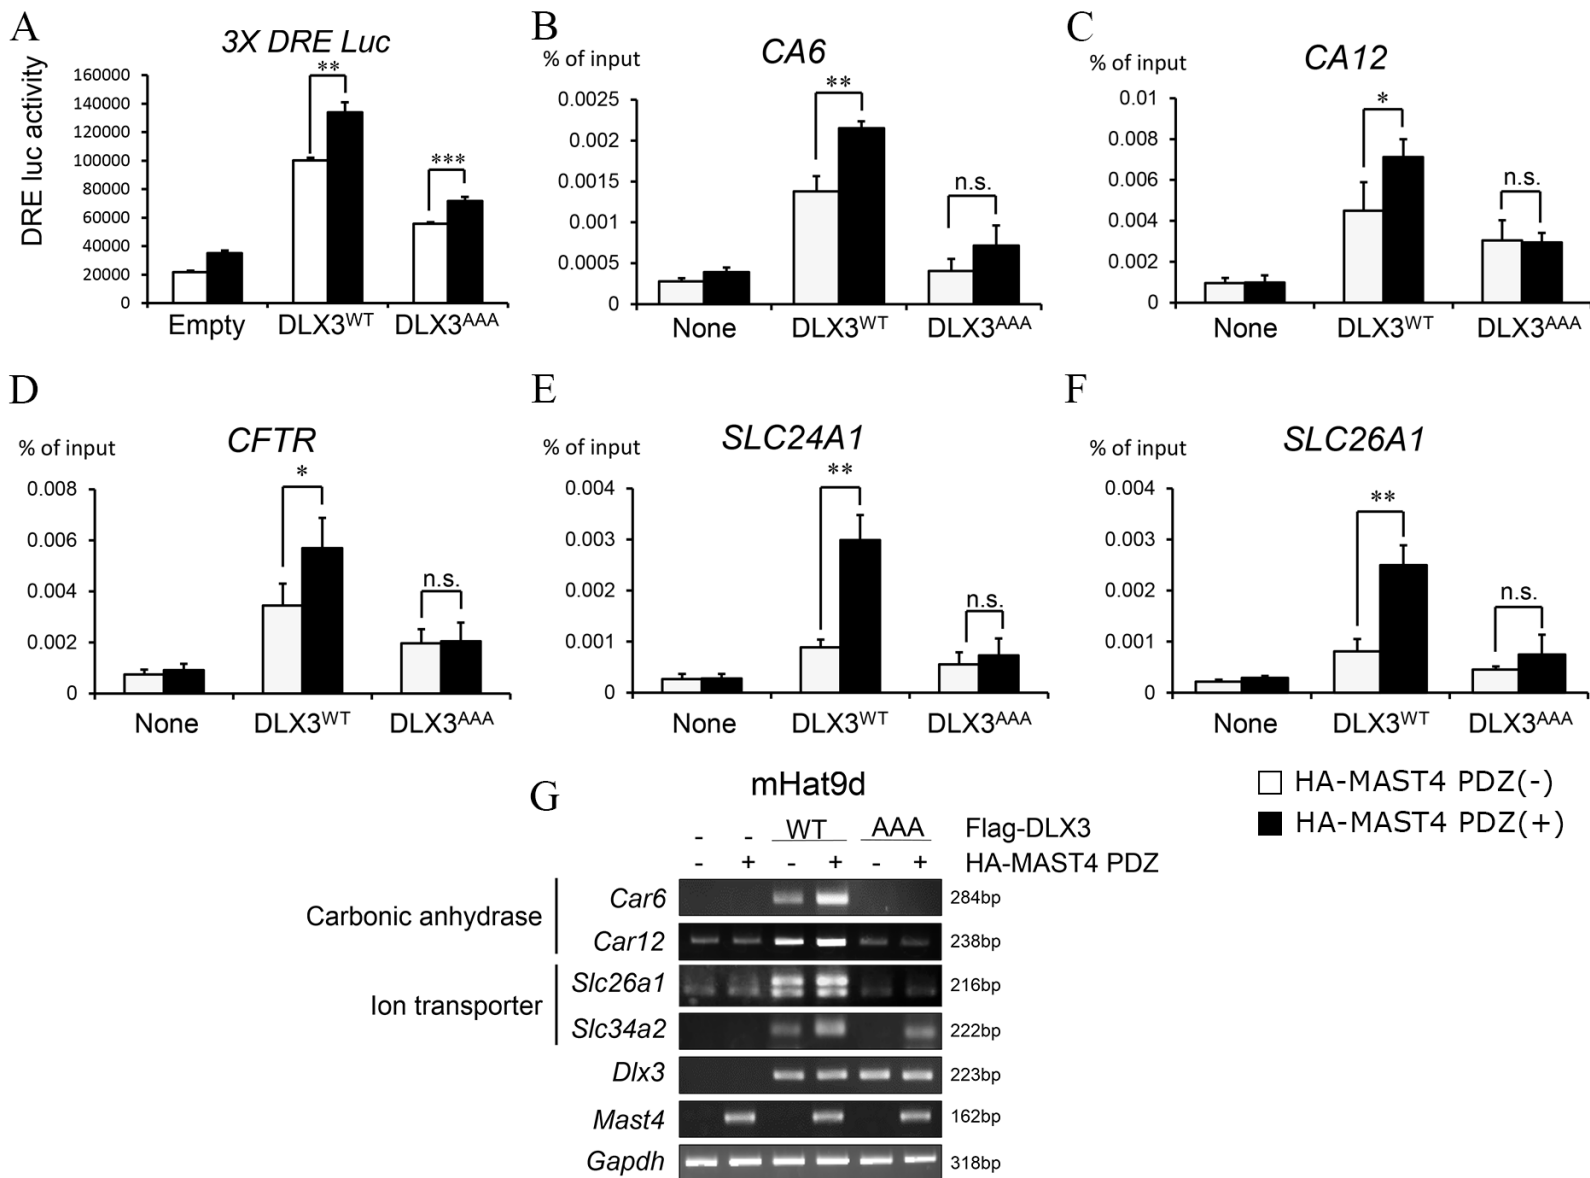

A

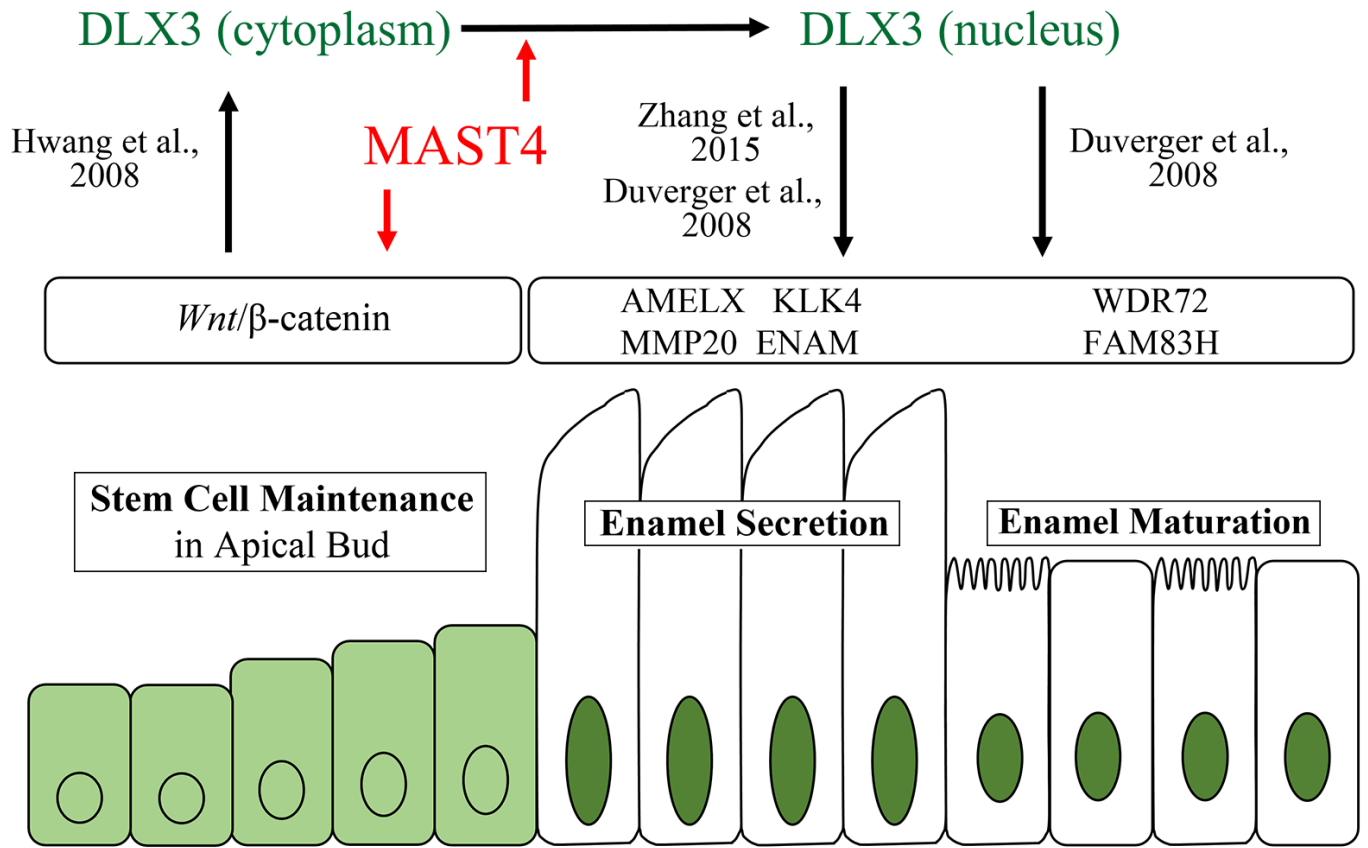

B

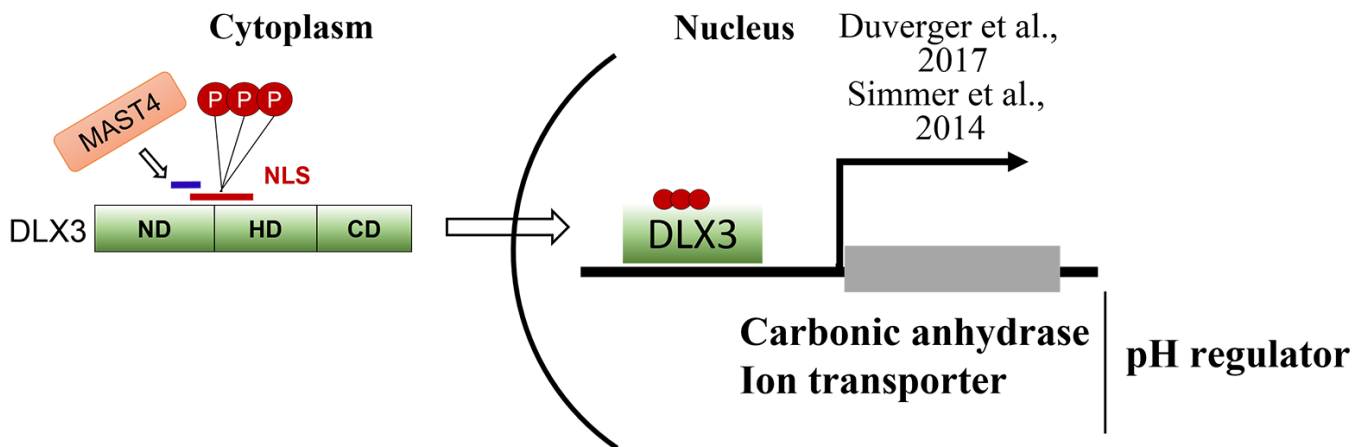

Source: https://www.biorxiv.org/content/10.1101/2021.12.15.472878v1.full.pdf
